# Supplementary material for: NEUROD2 function is dispensable for human pancreatic β cell specification
Source: Front Endocrinol (Lausanne). 2023 Oct 25;14:1286590. doi: 10.3389/fendo.2023.1286590 (PMC10634430; doi:10.3389/fendo.2023.1286590)
Supplement: Supplementary Table 1 — The lists of used primers for genotyping PCR, probes for qPCR, and primary and secondary antibodies used for FACS and immunostaining are provided. [file Table_1.xlsx]

## Sheet: Genotyping Primers
Fragment	Anneling temperature	Primer ID	Band (bp)	Sequence
5' WT band	62°C	EP 1931	1418 bp	GATATGCGAAGAGGCCGAGACG
		EP 1933		GATCTCCGAGAGCGCCCAGATATAG
5' KI band	62°C	EP 1931	961bp	GCCTTAGTCACCGCCTTCTTGG
		EP 1932		GCCTTAGTCACCGCCTTCTTGG
3' WT band	62°C	EP 1936	1264 bp	GATCTCCGAGAGCGCCCAGATATAG
		EP 1928		CCCCAAATCTCCGAGTCACTG
3' KI band	62°C	EP 1806	1138 bp	CCGCTCTGTCTCAATGGCAAC
		EP 1928		CCCCAAATCTCCGAGTCACTG

## Sheet: Antibody List
Primary antibody	Host	Company	Catalog No	WB (Dilution)	IHC / IF (Dilution)	FACS (Dilution)
PDX1	goat polycl.	R&D Systems	AF2419		1:300-500	1:200
NKX2.2	mouse monocl.	abcam	ab187375-		1:200	1:200
GFP	Chicken	Aves Labs	GFP-1020		1:1000
Neurogenin 3	sheep polycl.	R&D Systems	AF3444		1:100
Chromogranin A	rabbit polycl.	Abcam	ab283265		1:500	1:500
Neurogenin 3	rabbit polycl.	Aviva Systems Biology	OACD05949			1:200
Oct-3/4 (N-19)	goat polycl.	Santa Cruz	sc-8628		1:400
SOX2	rabbit monocl.	Cell Signaling	3579S		1:400
FOXA2 (HNF-3β) (D56D)	rabbit monocl.	Cell signaling	8186S		1:400
SOX17	goat polycl.	R&D	AF1924		1:400
SM22 alpha (Transgelin)	rabbit, polycl.	Abcam	ab14106		1:500
Tubulin beta III	rabbit polycl.	abcam	ab18207		1:1000
Snail1	goat polycl.	R&D Systems	AF3639		1:500
NKX6-1	goat polycl.	R&D systems	AF5857		1:200	1:200
Glucagon	guinea pig	Takara			1: 2500
Insulin	guinea pig	Thermo Scientific			1:300
Insulin	mouse	Abcam		1:1000	1:300
Insulin	rabbit	Cell Signaling		1:1000	1:300
anti-PDX1-PE	Mouse	BD Pharmingen™	562161			1:40
Nkx6.1-Alexa Fluor® 647	Mouse	BD Pharmingen™	563338			1:40
IgG1 κ Isotype Control-Alexa Fluor® 647	Mouse	BD Pharmingen™	563023			1:40
Human anti-TRA-1-60-PE		Miltenyi Biotech	130-105-639			1:11
REA Control (S)-PE-Vio615 Isotype control		Miltenyi Biotech	130-107-146			1:11
REA Control (S) FITC Isotype control		Miltenyi Biotech	130-104-610			1:11
Somatostatin ((H-11))	mouse monocl.	Santa Cruz	sc-74556		1:300	1:200
Secondary antibody (anti-)	Company	Order Number	Label	Dilution
Chicken	Dianova	703-225-155	Cy™2	1-800
Rat	Life Technologies	A-21208	Alexa Flour® 488	1-800
Rat	Dianova	712-165-153	Cy™3	1-800
Rat	Dianova	712-605-150	Alexa Flour® 647	1-800
Rabbit	Invitrogen	A11055	Alexa Flour® 488	1-800
Rabbit	Invitrogen	A21206	Alexa Flour® 555	1-800
Rabbit	Dianova	A31573	Alexa Flour® 647	1-800
Guinea pig	Dianova	706-545-148	Alexa Flour® 488	1-800
Guinea pig	Dianova/Jackson	706-165-148	Cy™3	1-800
Guinea pig	Dianova	706-495-148	Alexa Flour® 649	1-800
Goat	Invitrogen	A21432	Alexa Flour® 555	1-800
Goat	Invitrogen	A21082	Alexa Flour® 633	1-800
Mouse	Invitrogen	A21202	Alexa Flour® 488	1-800
Mouse	Invitrogen	A31570	Alexa Flour® 555	1-800
Mouse	Dianova	715-175-151	Cy™5	1-400
Mouse	Dianova/Jackson	DAB-087641	IgG (H+L), HRP	1:5000
Rabbit	Dianova/Jackson	DAB-087729	IgG (H+L), HRP	1:5000
Mouse	Dianova/Jackson	115-035-146	IgG (H+L), HRP	1:5000
Rabbit	Dianova/Jackson	111-035-144	IgG (H+L), HRP	1:5000
Mouse	Cell signaling	7076P2	IgG (H+L), HRP	1:2000
Rabbit	Cell signaling	7074P2	IgG (H+L), HRP	1:2000

## Sheet: qPCR probes
Gene	TaqMan® Primer Prob ID
GAPDH	Hs02758991_g1
18S	Hs99999901_s1
INSULIN	Hs02741908_m1
GLUCAGON	Hs01031536_m1
FOXA2	Hs00232764_m1
PDX1	Hs00236830_m1
NGN3	Hs01875204_s1
NKX6-1	Hs01055914_m1
NKX2-2	Hs00159616_m1
ARX	Hs002292465_m1
PAX4	Hs00173014_m1
CGHA	Hs00900375_m1
HHEX	Hs00242160_m1
FEV	Hs00232733_m1
