# Supplementary material for: NEUROD2 function is dispensable for human pancreatic β cell specification
Source: Front Endocrinol (Lausanne). 2023 Oct 25;14:1286590. doi: 10.3389/fendo.2023.1286590 (PMC10634430; doi:10.3389/fendo.2023.1286590)
Supplement: Supplementary Table 2 — Differential expressed genes in Neurod2high and Neurod2low/- cells and the corresponding pathway analyses of the upregulated list. The list of overlapped genes between the list of upregulated or downregulated genes in Neurod2high cells and the list of Neurod2 target genes from Bayam et al., 2015. [file Table_2.xlsx]

## Sheet: Upregulated in Ndrfhigh
names	logfc	logexprs	pvals_adj	log_pvals_adj	logfc_limit	color
Neurod2	6.97619	7.75818	1.61421e-57	56.792	6.97619	#1f77b4
Ctrb1	0.652736	9.14663	2.10216e-34	33.6773	0.652736	#1f77b4			List of upregulated genes in Ndrfhigh cells compared to Ndrflow/- cells from Bastidas-Ponce et al., 2019.
Selm	0.566618	9.19658	2.2403e-31	30.6497	0.566618	#1f77b4
Cck	0.491937	9.888	1.16093e-30	29.9352	0.491937	#1f77b4
Jun	0.680015	8.81222	4.61745e-29	28.3356	0.680015	#1f77b4
Pnliprp1	0.628345	8.55119	7.68799e-24	23.1142	0.628345	#1f77b4
Neurod1	0.565968	8.59395	5.06702e-23	22.2952	0.565968	#1f77b4
Ctsf	0.592483	8.29934	1.80764e-21	20.7429	0.592483	#1f77b4
Runx1t1	0.722276	7.9842	1.87395e-20	19.7272	0.722276	#1f77b4
Tubb3	0.426241	8.94323	4.1726e-20	19.3796	0.426241	#1f77b4
Olfm1	0.814127	7.64979	4.6192e-20	19.3354	0.814127	#1f77b4
Drap1	0.414366	8.96527	2.37361e-19	18.6246	0.414366	#1f77b4
Ppp3ca	0.558275	8.37868	2.37361e-19	18.6246	0.558275	#1f77b4
Upk3bl	1.21501	6.92919	6.09655e-19	18.2149	1.21501	#1f77b4
Gdap1l1	0.649836	7.92584	2.37877e-18	17.6236	0.649836	#1f77b4
Vwa5b2	0.468274	8.66007	9.25654e-18	17.0336	0.468274	#1f77b4
Sult2b1	0.700457	7.73281	1.2269e-17	16.9112	0.700457	#1f77b4
Igsf8	0.48356	8.34973	3.86853e-17	16.4125	0.48356	#1f77b4
Btg2	0.317152	9.50744	1.08579e-16	15.9643	0.317152	#1f77b4
Lynx1	0.972618	6.97849	1.38367e-16	15.859	0.972618	#1f77b4
Fxyd3	0.436822	8.57467	1.7833e-16	15.7488	0.436822	#1f77b4
1110012L19Rik	0.448198	8.49816	5.02315e-16	15.299	0.448198	#1f77b4
Map1b	0.337679	9.2458	8.12899e-16	15.09	0.337679	#1f77b4
Rgs17	0.544881	7.95396	8.53475e-16	15.0688	0.544881	#1f77b4
Krt7	0.330702	9.29746	9.50169e-16	15.0222	0.330702	#1f77b4
Ypel3	0.366494	8.98245	1.65125e-15	14.7822	0.366494	#1f77b4
Celf3	0.590379	7.91716	3.80556e-15	14.4196	0.590379	#1f77b4
BC023829	0.409109	8.5958	1.00499e-14	13.9978	0.409109	#1f77b4
Hpca	0.607369	7.68302	3.24625e-14	13.4886	0.607369	#1f77b4
Gm10709	0.972518	6.75941	7.06009e-14	13.1512	0.972518	#1f77b4
Dner	1.35097	6.05052	7.57126e-14	13.1208	1.35097	#1f77b4
Scin	1.26238	5.94031	5.20255e-13	12.2838	1.26238	#1f77b4
Col9a2	0.484644	7.91869	7.33698e-13	12.1345	0.484644	#1f77b4
Hpcal1	0.470328	7.99268	8.43484e-13	12.0739	0.470328	#1f77b4
Shf	0.642235	7.24246	4.53732e-12	11.3432	0.642235	#1f77b4
Insrr	1.14758	5.92608	1.23805e-11	10.9073	1.14758	#1f77b4
Cacna2d1	0.427007	8.09935	2.11216e-11	10.6753	0.427007	#1f77b4
Enho	0.684213	7.09037	3.7293e-11	10.4284	0.684213	#1f77b4
Dpysl4	0.922387	6.47866	4.24797e-11	10.3718	0.922387	#1f77b4
Tmbim1	0.500236	7.64377	4.80184e-11	10.3186	0.500236	#1f77b4
Kcnq4	1.39242	5.26614	9.36563e-11	10.0285	1.39242	#1f77b4
Myt1	0.674935	7.01293	1.89744e-10	9.72183	0.674935	#1f77b4
Cd40	1.03495	5.93568	2.27047e-10	9.64388	1.03495	#1f77b4
Dll3	0.527131	7.44533	2.4037e-10	9.61912	0.527131	#1f77b4
Celf4	0.827871	6.48209	2.40945e-10	9.61808	0.827871	#1f77b4
Spint1	0.334924	8.56169	9.9264e-10	9.00321	0.334924	#1f77b4
Pax4	0.31381	8.72314	1.3874e-09	8.8578	0.31381	#1f77b4
Lurap1l	0.495723	7.42204	1.46258e-09	8.83488	0.495723	#1f77b4
Lhx1	0.808126	6.43813	1.65761e-09	8.78052	0.808126	#1f77b4
Chga	0.358689	8.30534	2.26514e-09	8.64491	0.358689	#1f77b4
Npdc1	0.463975	7.54563	3.4967e-09	8.45634	0.463975	#1f77b4
Grin2c	0.800829	6.35706	4.19304e-09	8.37747	0.800829	#1f77b4
Abhd16a	0.558515	7.18955	4.31212e-09	8.36531	0.558515	#1f77b4
Nhlh1	0.872543	6.17075	5.7416e-09	8.24097	0.872543	#1f77b4
Nek6	0.87385	6.07525	6.70932e-09	8.17332	0.87385	#1f77b4
Cer1	0.525062	7.26227	7.34681e-09	8.1339	0.525062	#1f77b4
Cacna1a	0.479854	7.43676	1.16896e-08	7.9322	0.479854	#1f77b4
Klc3	0.392581	7.90693	1.66533e-08	7.7785	0.392581	#1f77b4
Miat	0.658258	6.70868	1.77542e-08	7.7507	0.658258	#1f77b4
Ins2	0.521852	7.15196	2.16073e-08	7.6654	0.521852	#1f77b4
Rbfox3	0.422524	7.6577	2.87724e-08	7.54102	0.422524	#1f77b4
Cited2	0.410826	7.78716	2.90959e-08	7.53617	0.410826	#1f77b4
Jph4	1.33614	4.88894	2.94812e-08	7.53045	1.33614	#1f77b4
Lmna	0.313211	8.49862	3.21477e-08	7.49285	0.313211	#1f77b4
H2-Q2	0.635921	6.78673	3.48945e-08	7.45724	0.635921	#1f77b4
Kcnb2	0.670701	6.54992	3.7845e-08	7.42199	0.670701	#1f77b4
Pik3r1	0.46501	7.33624	6.16347e-08	7.21017	0.46501	#1f77b4
Spink1	0.66146	6.61234	6.16442e-08	7.21011	0.66146	#1f77b4
Plcxd3	0.686992	6.45719	6.24479e-08	7.20448	0.686992	#1f77b4
Stxbp1	0.441936	7.45236	7.26449e-08	7.13879	0.441936	#1f77b4
Cltb	0.468196	7.28968	8.6667e-08	7.06215	0.468196	#1f77b4
Fam213b	0.496974	7.26565	9.04692e-08	7.0435	0.496974	#1f77b4
Isl1	0.64941	6.71416	9.13628e-08	7.03923	0.64941	#1f77b4
Cpe	0.35903	8.01946	9.22523e-08	7.03502	0.35903	#1f77b4
Cldn11	0.694021	6.42958	9.83259e-08	7.00733	0.694021	#1f77b4
Mfng	0.310268	8.42486	1.04166e-07	6.98227	0.310268	#1f77b4
Qdpr	0.336448	8.17522	1.28632e-07	6.89065	0.336448	#1f77b4
Tmem184a	0.419067	7.53646	1.54973e-07	6.80974	0.419067	#1f77b4
Fam210b	0.98039	5.56206	1.85556e-07	6.73153	0.98039	#1f77b4
Hist1h1c	0.613445	6.6875	1.98645e-07	6.70192	0.613445	#1f77b4
Prnp	0.471588	7.3245	2.38426e-07	6.62265	0.471588	#1f77b4
Serping1	0.485685	7.25815	2.6109e-07	6.58321	0.485685	#1f77b4
Tspan5	0.697658	6.34288	2.62884e-07	6.58024	0.697658	#1f77b4
Hagh	0.412267	7.53345	2.63404e-07	6.57938	0.412267	#1f77b4
Upp1	0.584232	6.77342	2.8836e-07	6.54007	0.584232	#1f77b4
Ostf1	0.516821	7.07408	3.51123e-07	6.45454	0.516821	#1f77b4
Serpini1	0.58279	6.72124	3.66283e-07	6.43618	0.58279	#1f77b4
Fhl2	0.601913	6.60226	4.02602e-07	6.39512	0.601913	#1f77b4
Tnfrsf12a	0.775352	6.03084	4.44478e-07	6.35215	0.775352	#1f77b4
Dmpk	0.653321	6.38721	5.4084e-07	6.26693	0.653321	#1f77b4
Cpa2	0.352152	7.91244	5.48088e-07	6.26115	0.352152	#1f77b4
Nt5dc2	0.300696	8.35635	5.8481e-07	6.23299	0.300696	#1f77b4
Tmem114	1.06995	5.12917	6.60186e-07	6.18033	1.06995	#1f77b4
Prss1	0.986973	5.24528	8.251e-07	6.08349	0.986973	#1f77b4
Nfic	0.702297	6.29831	9.47364e-07	6.02348	0.702297	#1f77b4
Aacs	0.689177	6.34127	1.10745e-06	5.95568	0.689177	#1f77b4
Ids	0.447007	7.15285	1.3008e-06	5.88579	0.447007	#1f77b4
Vat1l	1.01892	5.18284	1.44906e-06	5.83891	1.01892	#1f77b4
Camk2n2	0.572754	6.55124	1.71937e-06	5.76463	0.572754	#1f77b4
Prr15l	0.539995	6.72187	1.89732e-06	5.72186	0.539995	#1f77b4
Fam53b	0.711549	6.02959	1.97534e-06	5.70436	0.711549	#1f77b4
Hepacam2	0.455552	7.05353	2.01944e-06	5.69477	0.455552	#1f77b4
Sqstm1	0.343189	7.85206	2.08439e-06	5.68102	0.343189	#1f77b4
Cd200	0.593181	6.62715	2.09171e-06	5.6795	0.593181	#1f77b4
Atf3	1.18257	4.67381	2.38351e-06	5.62278	1.18257	#1f77b4
Dusp1	0.644842	6.37582	3.45757e-06	5.46123	0.644842	#1f77b4
Pacsin1	0.963042	5.1317	3.50533e-06	5.45527	0.963042	#1f77b4
Siah2	0.489092	6.95792	4.36473e-06	5.36004	0.489092	#1f77b4
Epb42	0.547502	6.65231	4.37324e-06	5.3592	0.547502	#1f77b4
Prkar1b	0.442911	7.04244	4.70227e-06	5.32769	0.442911	#1f77b4
Pbx1	0.34885	7.69813	5.6086e-06	5.25115	0.34885	#1f77b4
Ncs1	0.561167	6.45083	6.62692e-06	5.17869	0.561167	#1f77b4
Dusp8	0.74771	5.71949	6.68418e-06	5.17495	0.74771	#1f77b4
Ndc1	0.619559	6.18639	7.17725e-06	5.14404	0.619559	#1f77b4
Rundc3a	0.425332	7.1034	7.47708e-06	5.12627	0.425332	#1f77b4
Fam49b	0.351733	7.62794	8.38849e-06	5.07632	0.351733	#1f77b4
H2-D1	0.412961	7.16965	8.65324e-06	5.06282	0.412961	#1f77b4
Nfatc2	1.00479	4.98033	9.98769e-06	5.00054	1.00479	#1f77b4
Sulf2	0.331045	7.77387	1.02788e-05	4.98806	0.331045	#1f77b4
Pdk3	0.337767	7.717	1.02788e-05	4.98806	0.337767	#1f77b4
Map3k15	0.552247	6.52994	1.02788e-05	4.98806	0.552247	#1f77b4
Ccpg1	0.675555	5.98623	1.07484e-05	4.96866	0.675555	#1f77b4
Elavl4	0.580883	6.30158	1.43979e-05	4.8417	0.580883	#1f77b4
St6galnac4	0.607606	6.19201	1.50443e-05	4.82263	0.607606	#1f77b4
Reep5	0.324732	7.77738	1.58418e-05	4.80019	0.324732	#1f77b4
Smim24	0.777052	5.50654	1.77143e-05	4.75168	0.777052	#1f77b4
Grina	0.368532	7.38108	2.16438e-05	4.66467	0.368532	#1f77b4
Krtap17-1	0.341195	7.59921	2.16575e-05	4.66439	0.341195	#1f77b4
Actn3	0.660193	5.85649	2.16575e-05	4.66439	0.660193	#1f77b4
Gnptg	0.387767	7.23119	2.21897e-05	4.65385	0.387767	#1f77b4
Fbxl16	0.489986	6.58787	2.32562e-05	4.63346	0.489986	#1f77b4
Fam207a	0.47503	6.67492	2.43497e-05	4.61351	0.47503	#1f77b4
1810041L15Rik	0.502037	6.55466	2.46328e-05	4.60849	0.502037	#1f77b4
Klhdc8a	0.887572	5.098	3.24639e-05	4.4886	0.887572	#1f77b4
Crlf1	0.809001	5.29664	3.28025e-05	4.48409	0.809001	#1f77b4
Mycl	0.386669	7.17386	3.68304e-05	4.43379	0.386669	#1f77b4
Emb	0.326772	7.64443	3.87043e-05	4.41224	0.326772	#1f77b4
Zfhx2	0.717525	5.54526	4.70812e-05	4.32715	0.717525	#1f77b4
Baiap3	0.562252	6.22134	4.86386e-05	4.31302	0.562252	#1f77b4
Gipr	0.662128	5.82849	4.99502e-05	4.30146	0.662128	#1f77b4
Lpcat3	0.37473	7.21909	5.05258e-05	4.29649	0.37473	#1f77b4
Atg3	0.342596	7.47086	5.12573e-05	4.29024	0.342596	#1f77b4
Try10	1.11077	4.58991	5.16942e-05	4.28656	1.11077	#1f77b4
Slc29a1	0.487579	6.49486	5.78684e-05	4.23756	0.487579	#1f77b4
Cela3b	0.812901	5.38859	5.9187e-05	4.22777	0.812901	#1f77b4
Mid1ip1	0.317272	7.66132	6.26219e-05	4.20327	0.317272	#1f77b4
Igsf21	0.615588	6.03343	6.4305e-05	4.19175	0.615588	#1f77b4
Ptprn2	0.429228	6.80397	6.74955e-05	4.17072	0.429228	#1f77b4
Isg20	0.555324	6.17199	6.86661e-05	4.16326	0.555324	#1f77b4
Gm648	1.35832	4.01969	8.14479e-05	4.08912	1.35832	#1f77b4
Cir1	0.373237	7.14395	9.40852e-05	4.02648	0.373237	#1f77b4
Nptx1	0.642169	5.75709	9.43125e-05	4.02543	0.642169	#1f77b4
Svip	0.489863	6.50549	9.44379e-05	4.02485	0.489863	#1f77b4
Samd14	0.44323	6.69237	0.000110875	3.95517	0.44323	#1f77b4
Gm4319	1.37281	3.95095	0.000116469	3.93379	1.37281	#1f77b4
Slc29a4	0.470914	6.48743	0.000132943	3.87633	0.470914	#1f77b4
St6galnac2	0.319158	7.53548	0.000133151	3.87565	0.319158	#1f77b4
Psip1	0.325095	7.47394	0.000141278	3.84992	0.325095	#1f77b4
1810008I18Rik	0.557289	6.1229	0.000145678	3.83661	0.557289	#1f77b4
Zfp36	0.598826	5.90019	0.000146266	3.83486	0.598826	#1f77b4
Dab1	0.539699	6.28014	0.000154594	3.81081	0.539699	#1f77b4
B9d2	0.458496	6.50783	0.000155005	3.80965	0.458496	#1f77b4
Cib2	0.381354	7.0041	0.000157015	3.80406	0.381354	#1f77b4
Mmd2	0.36677	7.10695	0.000165094	3.78227	0.36677	#1f77b4
Gm609	1.30076	3.98663	0.000201603	3.6955	1.30076	#1f77b4
Cog1	0.36616	7.07673	0.000204559	3.68918	0.36616	#1f77b4
Nefm	0.523414	6.41172	0.000210818	3.67609	0.523414	#1f77b4
Fam131a	0.809128	4.99962	0.000211043	3.67563	0.809128	#1f77b4
Sh2d5	0.463094	6.41842	0.000218898	3.65976	0.463094	#1f77b4
Chn2	0.739865	5.17068	0.000230235	3.63783	0.739865	#1f77b4
Mad2l2	0.320311	7.42997	0.000239	3.6216	0.320311	#1f77b4
Atg4a	0.562949	5.946	0.000271896	3.5656	0.562949	#1f77b4
Osbpl5	0.8856	4.70366	0.000271996	3.56544	0.8856	#1f77b4
Ccdc92	0.647228	5.50941	0.00030867	3.51051	0.647228	#1f77b4
Srp68	0.300184	7.57127	0.000312101	3.5057	0.300184	#1f77b4
Lrp11	0.404677	6.73065	0.000312632	3.50497	0.404677	#1f77b4
Plk3	0.347441	7.13756	0.000344926	3.46227	0.347441	#1f77b4
Notum	0.392455	6.7897	0.00035192	3.45356	0.392455	#1f77b4
Nupr1	0.575706	5.83925	0.000377234	3.42339	0.575706	#1f77b4
Kit	0.426138	6.54583	0.000377376	3.42323	0.426138	#1f77b4
Banp	0.385558	6.82225	0.000389866	3.40908	0.385558	#1f77b4
Shroom3	0.809872	4.84745	0.000390534	3.40834	0.809872	#1f77b4
Tle1	0.548973	5.90828	0.000391772	3.40697	0.548973	#1f77b4
Tbc1d9	0.351949	7.07722	0.000395079	3.40332	0.351949	#1f77b4
Rem2	0.361739	6.99753	0.000398686	3.39937	0.361739	#1f77b4
Tcp11l2	0.602051	5.6793	0.000401497	3.39632	0.602051	#1f77b4
Sfn	0.63059	5.48861	0.000445865	3.3508	0.63059	#1f77b4
Cel	0.688464	5.33871	0.000460333	3.33693	0.688464	#1f77b4
Galr2	0.95348	4.67187	0.000468165	3.3296	0.95348	#1f77b4
Arhgef2	0.435381	6.44652	0.00046867	3.32913	0.435381	#1f77b4
Tmem150c	0.786865	4.97112	0.000506763	3.29519	0.786865	#1f77b4
Pdk2	0.462231	6.30549	0.000543636	3.26469	0.462231	#1f77b4
Apbb2	0.560456	5.78938	0.000624446	3.20451	0.560456	#1f77b4
Dnaja4	0.972598	4.47047	0.000706872	3.15066	0.972598	#1f77b4
1520401A03Rik	0.792768	4.83776	0.000757338	3.12071	0.792768	#1f77b4
Spock2	0.370755	6.80516	0.000788055	3.10344	0.370755	#1f77b4
Slc25a22	0.580485	5.61092	0.000807089	3.09308	0.580485	#1f77b4
Taok3	0.507314	5.99234	0.000839412	3.07602	0.507314	#1f77b4
Efna3	1.04982	4.13825	0.000839412	3.07602	1.04982	#1f77b4
Tmem53	0.453166	6.31569	0.000860992	3.065	0.453166	#1f77b4
Tubb2b	0.334388	7.06213	0.000946438	3.02391	0.334388	#1f77b4
1600014C10Rik	0.571529	5.59071	0.000946438	3.02391	0.571529	#1f77b4
Whrn	0.769516	4.92386	0.000960657	3.01743	0.769516	#1f77b4
Tspyl4	0.879254	4.5334	0.000960657	3.01743	0.879254	#1f77b4
Fam134a	0.332786	7.0658	0.000996824	3.00138	0.332786	#1f77b4
Nmnat3	0.548655	5.67235	0.00101438	2.9938	0.548655	#1f77b4
Stard5	0.556854	5.62225	0.00124008	2.90655	0.556854	#1f77b4
Smad1	0.381849	6.62489	0.00126722	2.89715	0.381849	#1f77b4
Pisd	0.430752	6.36172	0.00128984	2.88946	0.430752	#1f77b4
Klhl24	0.403874	6.47424	0.00131897	2.87976	0.403874	#1f77b4
Vps37b	0.323768	7.07598	0.00135231	2.86892	0.323768	#1f77b4
Slit1	0.909456	4.37276	0.00140471	2.85241	0.909456	#1f77b4
Flrt1	0.770476	4.92501	0.00143796	2.84225	0.770476	#1f77b4
Synpr	0.542271	5.69311	0.00148886	2.82715	0.542271	#1f77b4
Tpst1	0.324286	7.04885	0.00151361	2.81999	0.324286	#1f77b4
Fat1	0.394297	6.51397	0.00155032	2.80958	0.394297	#1f77b4
Ica1	0.723147	4.94412	0.00155032	2.80958	0.723147	#1f77b4
Rnf215	0.42331	6.30685	0.00156842	2.80454	0.42331	#1f77b4
Stxbp5l	0.388333	6.65192	0.00157709	2.80214	0.388333	#1f77b4
Fbxo44	0.400223	6.45357	0.00167659	2.77557	0.400223	#1f77b4
Eml5	0.495126	5.88866	0.00172971	2.76203	0.495126	#1f77b4
Kcnma1	0.671583	5.02279	0.00183749	2.73578	0.671583	#1f77b4
Snd1	0.309751	7.13156	0.00187412	2.7272	0.309751	#1f77b4
Gm10093	0.789343	4.65728	0.00189112	2.72328	0.789343	#1f77b4
Gatad2b	0.306754	7.15146	0.00192335	2.71594	0.306754	#1f77b4
Try5	0.875103	4.47521	0.00207903	2.68214	0.875103	#1f77b4
Glod5	0.867979	4.60346	0.00211597	2.67449	0.867979	#1f77b4
Slc31a2	0.308301	7.10998	0.0021699	2.66356	0.308301	#1f77b4
Esrp1	0.449478	6.07729	0.00219306	2.65895	0.449478	#1f77b4
Smpd3	0.627983	5.16717	0.00222966	2.65176	0.627983	#1f77b4
Kcnh8	0.6051	5.27514	0.00224323	2.64913	0.6051	#1f77b4
Msrb2	0.312639	7.05838	0.00228681	2.64077	0.312639	#1f77b4
Mecp2	0.398484	6.36857	0.00232244	2.63405	0.398484	#1f77b4
Akr1b8	0.696824	5.03763	0.00233097	2.63246	0.696824	#1f77b4
Mapre3	0.315341	7.01961	0.00241824	2.6165	0.315341	#1f77b4
Tmed8	0.517632	5.76672	0.00250519	2.60116	0.517632	#1f77b4
Atp8b1	0.368413	6.7577	0.00250545	2.60111	0.368413	#1f77b4
Celf2	0.403064	6.30632	0.00264304	2.5779	0.403064	#1f77b4
Syp	0.624351	5.31402	0.00272408	2.56478	0.624351	#1f77b4
Pak3	0.443728	6.02957	0.00284185	2.5464	0.443728	#1f77b4
Stat3	0.369128	6.52218	0.00304032	2.51708	0.369128	#1f77b4
Rwdd3	1.03063	3.87146	0.00309745	2.509	1.03063	#1f77b4
Kcnc3	0.50502	5.81027	0.00339305	2.46941	0.50502	#1f77b4
Pgm2l1	0.443198	5.95566	0.00376794	2.4239	0.443198	#1f77b4
Tsga10ip	0.873528	4.22623	0.00378832	2.42155	0.873528	#1f77b4
Pde2a	0.922855	4.14156	0.00380557	2.41958	0.922855	#1f77b4
Neat1	0.697408	4.92557	0.00388335	2.41079	0.697408	#1f77b4
Tmem9b	0.336808	6.6909	0.00435907	2.36061	0.336808	#1f77b4
Dnm1	0.653818	4.92698	0.00445336	2.35131	0.653818	#1f77b4
Ece1	0.413029	6.17863	0.00446752	2.34993	0.413029	#1f77b4
Pcsk2	0.588052	5.34293	0.00470556	2.32739	0.588052	#1f77b4
Mus81	0.552957	5.30803	0.00471153	2.32684	0.552957	#1f77b4
Slco2a1	0.497374	5.67271	0.00483138	2.31593	0.497374	#1f77b4
Mboat4	0.633723	5.10858	0.00487193	2.3123	0.633723	#1f77b4
Prss2	0.967792	3.95454	0.00502272	2.29906	0.967792	#1f77b4
Tdrkh	0.45908	5.78073	0.00510532	2.29198	0.45908	#1f77b4
Pkn1	0.346328	6.56885	0.00515113	2.2881	0.346328	#1f77b4
Junb	0.336082	6.64711	0.00530329	2.27545	0.336082	#1f77b4
Etnk1	0.622759	4.9447	0.0053452	2.27204	0.622759	#1f77b4
Ppp1r15a	0.422777	5.9994	0.00534722	2.27187	0.422777	#1f77b4
R3hdm1	0.303545	6.92396	0.00554079	2.25643	0.303545	#1f77b4
Il6ra	0.898302	4.13605	0.00555261	2.2555	0.898302	#1f77b4
Pcsk1	0.424728	6.02345	0.00608843	2.21549	0.424728	#1f77b4
Ddc	0.492261	5.68623	0.00608843	2.21549	0.492261	#1f77b4
Kif5c	0.888483	4.10382	0.00608843	2.21549	0.888483	#1f77b4
Wrap73	0.30802	6.85556	0.00611958	2.21328	0.30802	#1f77b4
Ccng2	0.302845	6.89676	0.00628636	2.2016	0.302845	#1f77b4
Aktip	0.403076	6.16071	0.00635027	2.19721	0.403076	#1f77b4
Fez1	0.6788	4.76134	0.00636268	2.19636	0.6788	#1f77b4
Nod1	0.473037	5.62559	0.00675869	2.17014	0.473037	#1f77b4
Mapk15	0.375955	6.35457	0.00689409	2.16152	0.375955	#1f77b4
Tcp11	0.36879	6.31291	0.00696306	2.1572	0.36879	#1f77b4
Srl	0.520316	5.36786	0.00727806	2.13798	0.520316	#1f77b4
Flii	0.410415	6.14462	0.00751557	2.12404	0.410415	#1f77b4
Zkscan14	0.574464	5.05055	0.00885318	2.0529	0.574464	#1f77b4
Crybb1	0.489995	5.62607	0.00885959	2.05259	0.489995	#1f77b4
Wdr45	0.393505	6.05609	0.00909034	2.04142	0.393505	#1f77b4
Hivep1	0.675147	4.73055	0.00981697	2.00802	0.675147	#1f77b4
9430016H08Rik	0.322214	6.59514	0.00992967	2.00307	0.322214	#1f77b4
Atp2a3	0.492164	5.47154	0.00995173	2.0021	0.492164	#1f77b4
Abca7	0.942956	3.82782	0.010025	1.99892	0.942956	#1f77b4
Plk5	0.649896	4.66024	0.0102699	1.98843	0.649896	#1f77b4
Hdac5	0.43523	5.78192	0.0105929	1.97499	0.43523	#1f77b4
Syt11	0.561024	5.13808	0.0106012	1.97465	0.561024	#1f77b4
Tmem229a	0.805779	4.17134	0.0108816	1.96331	0.805779	#1f77b4
Thoc6	0.326298	6.51569	0.0114307	1.94193	0.326298	#1f77b4
Atp9a	0.558439	5.1044	0.0115973	1.93564	0.558439	#1f77b4
Dpysl5	0.340982	6.38201	0.0117621	1.92952	0.340982	#1f77b4
Pex5l	0.475265	5.62515	0.0123608	1.90796	0.475265	#1f77b4
Klf10	0.301059	6.71192	0.0126124	1.8992	0.301059	#1f77b4
Ube2j1	0.359771	6.22741	0.0138205	1.85948	0.359771	#1f77b4
Tcea2	0.687862	4.45438	0.0143119	1.8443	0.687862	#1f77b4
Gabarapl1	0.311752	6.55534	0.0152204	1.81757	0.311752	#1f77b4
Galns	0.423504	5.70198	0.0152706	1.81614	0.423504	#1f77b4
Bsdc1	0.311945	6.55701	0.0155899	1.80716	0.311945	#1f77b4
Josd1	0.45853	5.44784	0.0165923	1.78009	0.45853	#1f77b4
Borcs6	0.428417	5.628	0.0170428	1.76846	0.428417	#1f77b4
Rdh5	0.745612	4.25395	0.018003	1.74466	0.745612	#1f77b4
Hip1r	0.429785	5.5782	0.0192931	1.7146	0.429785	#1f77b4
Kcnc1	0.640147	4.55484	0.0193001	1.71444	0.640147	#1f77b4
Plppr2	0.518371	5.04832	0.0200977	1.69685	0.518371	#1f77b4
Mvp	0.396333	5.86764	0.0204653	1.68898	0.396333	#1f77b4
Slc48a1	0.31954	6.38032	0.0210846	1.67603	0.31954	#1f77b4
Fermt2	0.322374	6.37006	0.0220535	1.65652	0.322374	#1f77b4
Uchl1	0.351851	6.13753	0.0223832	1.65008	0.351851	#1f77b4
Slc25a44	0.380767	5.89638	0.0233453	1.6318	0.380767	#1f77b4
Stox1	0.392134	5.78898	0.0238938	1.62171	0.392134	#1f77b4
Mapk8ip2	0.77554	3.97743	0.0240879	1.6182	0.77554	#1f77b4
Sdc3	0.829822	3.87078	0.0243371	1.61373	0.829822	#1f77b4
Arc	0.685079	4.38968	0.0248214	1.60517	0.685079	#1f77b4
Xab2	0.347378	6.07653	0.0253771	1.59556	0.347378	#1f77b4
Doc2b	0.514106	5.041	0.0253781	1.59554	0.514106	#1f77b4
Orai2	0.596865	4.64928	0.0253781	1.59554	0.596865	#1f77b4
1700037H04Rik	0.362591	5.95181	0.0255757	1.59217	0.362591	#1f77b4
Dennd1c	0.361957	5.95556	0.0256515	1.59089	0.361957	#1f77b4
Kif1a	0.439101	5.4148	0.0257682	1.58892	0.439101	#1f77b4
Unc13a	0.637991	4.58661	0.0259145	1.58646	0.637991	#1f77b4
Raph1	0.324785	6.25439	0.0259653	1.58561	0.324785	#1f77b4
Agl	0.53963	4.84618	0.0259653	1.58561	0.53963	#1f77b4
Trim9	0.436004	5.42374	0.0264965	1.57681	0.436004	#1f77b4
Plxna3	0.642413	4.40251	0.0266425	1.57442	0.642413	#1f77b4
C77080	0.69069	4.2762	0.0270181	1.56835	0.69069	#1f77b4
Gabbr1	0.724818	4.14018	0.0270757	1.56742	0.724818	#1f77b4
Cyfip2	0.328167	6.20293	0.0275429	1.55999	0.328167	#1f77b4
Ephx4	0.81742	3.82026	0.0277919	1.55608	0.81742	#1f77b4
Plekha6	0.397206	5.65992	0.0281354	1.55075	0.397206	#1f77b4
Scg3	0.351465	6.02042	0.0284612	1.54575	0.351465	#1f77b4
Dhrs7	0.56182	4.83814	0.0287149	1.54189	0.56182	#1f77b4
Nmrk1	0.693048	4.18523	0.0293802	1.53194	0.693048	#1f77b4
Ak8	0.457527	5.24763	0.0316947	1.49901	0.457527	#1f77b4
Zc3h3	0.423372	5.43244	0.0321565	1.49273	0.423372	#1f77b4
Bend7	0.421657	5.515	0.0324685	1.48854	0.421657	#1f77b4
Foxo3	0.455351	5.21882	0.0331563	1.47943	0.455351	#1f77b4
Zfp174	0.578417	4.64142	0.0332444	1.47828	0.578417	#1f77b4
Ins1	0.468895	5.13358	0.0334791	1.47523	0.468895	#1f77b4
Slc36a1	0.368965	5.79919	0.0359119	1.44476	0.368965	#1f77b4
Tmem243	0.410802	5.45882	0.0368548	1.43351	0.410802	#1f77b4
Ap3b2	0.567666	4.67448	0.0370303	1.43144	0.567666	#1f77b4
Asns	0.446261	5.24664	0.0373649	1.42754	0.446261	#1f77b4
Rnf141	0.313533	6.19937	0.0381749	1.41822	0.313533	#1f77b4
Nsf	0.351283	5.88195	0.0385247	1.41426	0.351283	#1f77b4
Irf6	0.406877	5.55883	0.0391427	1.40735	0.406877	#1f77b4
Sept3	0.37805	5.66215	0.0392777	1.40585	0.37805	#1f77b4
Zfp667	0.436808	5.36593	0.0395821	1.4025	0.436808	#1f77b4
Exoc6b	0.414612	5.40296	0.0405455	1.39206	0.414612	#1f77b4
Rundc1	0.501515	4.86666	0.0406963	1.39045	0.501515	#1f77b4
Wdr47	0.358951	5.78941	0.0411237	1.38591	0.358951	#1f77b4
Pgf	0.402905	5.61672	0.042047	1.37627	0.402905	#1f77b4
4931406P16Rik	0.410688	5.47165	0.0426015	1.37058	0.410688	#1f77b4
Snx14	0.338784	5.92874	0.0427706	1.36885	0.338784	#1f77b4
Hap1	0.478211	5.04213	0.0427718	1.36884	0.478211	#1f77b4
Atf7	0.472028	5.01059	0.043184	1.36468	0.472028	#1f77b4
Rnf112	0.578941	4.50298	0.0434263	1.36225	0.578941	#1f77b4
Serpini2	0.656623	4.21404	0.044046	1.35609	0.656623	#1f77b4
Lrfn3	0.303308	6.22229	0.0444773	1.35186	0.303308	#1f77b4
Tekt2	0.324659	6.02764	0.0447797	1.34892	0.324659	#1f77b4
Rab3a	0.398181	5.4913	0.0453252	1.34366	0.398181	#1f77b4
Sez6l2	0.611839	4.34193	0.0453827	1.34311	0.611839	#1f77b4
Nudt7	0.354142	5.76781	0.046453	1.33299	0.354142	#1f77b4
Nr3c1	0.448689	5.14934	0.0471567	1.32646	0.448689	#1f77b4
Itsn2	0.379841	5.58611	0.0473644	1.32455	0.379841	#1f77b4
Kcnip3	0.58401	4.39781	0.0474679	1.3236	0.58401	#1f77b4
Cenpv	0.518273	4.70176	0.0481714	1.31721	0.518273	#1f77b4
Lgalsl	0.638129	4.2036	0.0481714	1.31721	0.638129	#1f77b4
Slc7a1	0.642768	4.21219	0.04927	1.30742	0.642768	#1f77b4

## Sheet: Downregulated in Ndrflow-
names	logfc	logexprs	pvals_adj	log_pvals_adj	logfc_limit	color
Spp1	-0.910867	8.32584	1.86049e-29	28.7304	-0.910867	#ff7f0e
Ambp	-0.493787	8.84344	1.3275e-22	21.877	-0.493787	#ff7f0e
Id1	-1.06282	7.29842	9.12821e-21	20.0396	-1.06282	#ff7f0e
Dll1	-1.68724	6.00934	2.87961e-18	17.5407	-1.68724	#ff7f0e
Phlda1	-0.78195	7.48666	6.70245e-18	17.1738	-0.78195	#ff7f0e
Dbi	-0.619884	7.89309	2.42286e-17	16.6157	-0.619884	#ff7f0e
Tmem171	-1.51284	6.0396	6.92532e-17	16.1596	-1.51284	#ff7f0e
Wfdc2	-0.71887	7.63905	7.73757e-17	16.1114	-0.71887	#ff7f0e
Cd82	-0.994656	7.02962	7.9163e-17	16.1015	-0.994656	#ff7f0e
Bcl2	-1.06142	6.77582	1.3322e-16	15.8754	-1.06142	#ff7f0e
Mgst1	-0.776593	7.48485	1.81835e-16	15.7403	-0.776593	#ff7f0e
Serpina1b	-1.13806	6.63687	1.85451e-16	15.7318	-1.13806	#ff7f0e
Sparc	-0.531284	8.14589	3.32854e-16	15.4777	-0.531284	#ff7f0e
Vim	-0.929584	6.97286	6.38015e-15	14.1952	-0.929584	#ff7f0e
Grin3a	-1.82613	5.24011	1.28128e-14	13.8924	-1.82613	#ff7f0e
Nptx2	-1.04006	6.57241	2.61975e-14	13.5817	-1.04006	#ff7f0e
Dlk1	-0.39904	8.60884	2.62493e-14	13.5809	-0.39904	#ff7f0e
Gsta3	-1.61617	5.543	2.6503e-14	13.5767	-1.61617	#ff7f0e
Tinagl1	-1.52593	5.64416	3.40824e-14	13.4675	-1.52593	#ff7f0e
Rsad2	-1.95171	5.0156	6.14321e-14	13.2116	-1.95171	#ff7f0e
Serpina1a	-1.59628	5.5672	6.14321e-14	13.2116	-1.59628	#ff7f0e
Rbp1	-0.710984	7.21681	9.23476e-14	13.0346	-0.710984	#ff7f0e
Crp	-1.22226	6.05228	9.99215e-14	13.0003	-1.22226	#ff7f0e
Fxyd2	-1.38475	5.73591	1.14061e-13	12.9429	-1.38475	#ff7f0e
Ttr	-0.329259	9.07532	1.50559e-13	12.8223	-0.329259	#ff7f0e
Sox11	-0.625487	7.53881	1.63294e-13	12.787	-0.625487	#ff7f0e
Gadd45g	-0.42763	8.25577	7.02719e-13	12.1532	-0.42763	#ff7f0e
Anxa2	-1.52531	5.43707	7.90682e-13	12.102	-1.52531	#ff7f0e
Acot1	-0.710997	7.17061	9.25581e-13	12.0336	-0.710997	#ff7f0e
Qsox1	-0.60348	7.5084	1.29945e-12	11.8862	-0.60348	#ff7f0e
Cxcl12	-2.1317	4.61091	1.45741e-12	11.8364	-2.1317	#ff7f0e
H19	-0.349657	8.76665	2.47208e-12	11.6069	-0.349657	#ff7f0e
Cdkn1c	-0.341054	8.80345	4.87518e-12	11.312	-0.341054	#ff7f0e
Cyba	-0.807495	6.84878	1.23805e-11	10.9073	-0.807495	#ff7f0e
Tcea3	-1.65635	4.98024	1.67385e-11	10.7763	-1.65635	#ff7f0e
Gm8773	-0.824961	6.88673	1.76332e-11	10.7537	-0.824961	#ff7f0e
Habp2	-0.983509	6.20527	1.93126e-11	10.7142	-0.983509	#ff7f0e
Capg	-1.41095	5.37711	1.2232e-10	9.9125	-1.41095	#ff7f0e
Igfbp5	-1.90616	4.47696	1.71954e-10	9.76459	-1.90616	#ff7f0e
Serpinf1	-1.09339	5.91935	1.89744e-10	9.72183	-1.09339	#ff7f0e
Cyb5a	-0.788177	6.59592	2.4276e-10	9.61482	-0.788177	#ff7f0e
Fam101a	-1.55696	4.83566	5.55662e-10	9.25519	-1.55696	#ff7f0e
Enpp2	-1.18978	5.47756	6.09082e-10	9.21532	-1.18978	#ff7f0e
Ttyh1	-1.02382	5.83051	9.9264e-10	9.00321	-1.02382	#ff7f0e
Aldh1b1	-0.577762	7.20043	1.10762e-09	8.95561	-0.577762	#ff7f0e
Fabp3	-1.78887	4.55422	1.15257e-09	8.93833	-1.78887	#ff7f0e
Timp3	-1.12884	5.58311	1.22698e-09	8.91116	-1.12884	#ff7f0e
Apoc1	-0.656252	6.85838	1.7124e-09	8.7664	-0.656252	#ff7f0e
S100a11	-0.348794	8.38503	1.88668e-09	8.7243	-0.348794	#ff7f0e
Suclg2	-0.985805	5.86472	1.8895e-09	8.72365	-0.985805	#ff7f0e
Tagln2	-0.620693	6.91342	2.00156e-09	8.69863	-0.620693	#ff7f0e
Fam174b	-0.662403	6.78809	2.24815e-09	8.64818	-0.662403	#ff7f0e
Gng13	-0.910034	6.00201	2.33503e-09	8.63171	-0.910034	#ff7f0e
Dusp10	-0.637453	6.82613	2.57187e-09	8.58975	-0.637453	#ff7f0e
Mest	-0.974199	5.8486	2.77813e-09	8.55625	-0.974199	#ff7f0e
Gpc3	-0.619814	6.88112	1.21582e-08	7.91513	-0.619814	#ff7f0e
Cdh3	-2.04257	3.99344	1.63104e-08	7.78753	-2.04257	#ff7f0e
Polr2i	-0.411594	7.75377	1.7144e-08	7.76589	-0.411594	#ff7f0e
Smoc2	-1.56799	4.50816	3.21477e-08	7.49285	-1.56799	#ff7f0e
Smco4	-0.745708	6.42501	3.21477e-08	7.49285	-0.745708	#ff7f0e
Dap	-0.502231	7.2806	3.43483e-08	7.46409	-0.502231	#ff7f0e
Fkbp9	-1.11581	5.34066	3.65604e-08	7.43699	-1.11581	#ff7f0e
Rcn3	-1.09095	5.3633	3.65604e-08	7.43699	-1.09095	#ff7f0e
Frk	-1.57481	4.41916	5.19757e-08	7.2842	-1.57481	#ff7f0e
Hs6st1	-0.745519	6.21971	7.54268e-08	7.12247	-0.745519	#ff7f0e
Col27a1	-1.83603	4.08421	7.63501e-08	7.11719	-1.83603	#ff7f0e
Igf2	-0.557246	6.91336	7.63501e-08	7.11719	-0.557246	#ff7f0e
Fgfrl1	-0.846147	5.88918	1.09191e-07	6.96181	-0.846147	#ff7f0e
Apoe	-0.407006	7.63067	1.11382e-07	6.95318	-0.407006	#ff7f0e
Galk1	-1.02789	5.32085	1.18254e-07	6.92718	-1.02789	#ff7f0e
Cdh1	-0.91775	5.73445	1.28632e-07	6.89065	-0.91775	#ff7f0e
Lamc1	-0.905771	5.639	1.77643e-07	6.75045	-0.905771	#ff7f0e
Glo1	-0.397224	7.65907	1.79452e-07	6.74605	-0.397224	#ff7f0e
Csrp2	-0.528015	7.00786	1.85614e-07	6.73139	-0.528015	#ff7f0e
Grn	-0.627704	6.5621	2.09869e-07	6.67805	-0.627704	#ff7f0e
Igf2bp1	-0.666828	6.34575	2.35133e-07	6.62869	-0.666828	#ff7f0e
Gm1673	-0.478624	7.09661	2.56581e-07	6.59078	-0.478624	#ff7f0e
Anapc13	-0.459175	7.20301	2.87667e-07	6.54111	-0.459175	#ff7f0e
Sct	-0.533666	6.83066	3.19501e-07	6.49553	-0.533666	#ff7f0e
Dhrs3	-1.23419	4.83384	3.85736e-07	6.41371	-1.23419	#ff7f0e
S100a10	-0.908915	5.54538	3.93589e-07	6.40496	-0.908915	#ff7f0e
Prodh2	-0.49601	6.96362	4.7669e-07	6.32176	-0.49601	#ff7f0e
Col2a1	-1.07331	5.05501	4.80689e-07	6.31814	-1.07331	#ff7f0e
Hdac11	-1.07116	5.03486	6.05656e-07	6.21777	-1.07116	#ff7f0e
Hes1	-1.05772	5.23353	6.10488e-07	6.21432	-1.05772	#ff7f0e
Serpina1d	-1.17875	4.80996	6.54842e-07	6.18386	-1.17875	#ff7f0e
Igfbp4	-1.15746	4.90674	6.60186e-07	6.18033	-1.15746	#ff7f0e
Spp2	-1.71247	4.06284	7.50887e-07	6.12443	-1.71247	#ff7f0e
Hkdc1	-1.44252	4.32101	7.50887e-07	6.12443	-1.44252	#ff7f0e
Notch1	-1.30664	4.60958	7.53989e-07	6.12263	-1.30664	#ff7f0e
Atoh8	-1.61766	4.07026	8.17337e-07	6.0876	-1.61766	#ff7f0e
Insig1	-0.655412	6.28373	9.96746e-07	6.00142	-0.655412	#ff7f0e
Gc	-0.835082	5.69582	1.18202e-06	5.92738	-0.835082	#ff7f0e
Actn1	-0.498313	6.93023	1.46963e-06	5.83279	-0.498313	#ff7f0e
Txndc5	-0.460207	7.05149	1.56237e-06	5.80621	-0.460207	#ff7f0e
Slc2a5	-0.815017	5.61429	1.70935e-06	5.76717	-0.815017	#ff7f0e
Pitpnm2	-1.01245	5.11686	1.73536e-06	5.76061	-1.01245	#ff7f0e
Metrn	-1.11503	4.82673	1.79081e-06	5.74695	-1.11503	#ff7f0e
Slc39a2	-0.61623	6.39748	1.79081e-06	5.74695	-0.61623	#ff7f0e
Mdfi	-0.720976	5.97146	1.86724e-06	5.7288	-0.720976	#ff7f0e
Wfdc15b	-0.510721	6.784	2.40659e-06	5.6186	-0.510721	#ff7f0e
Fn1	-0.911549	5.38515	2.69698e-06	5.56912	-0.911549	#ff7f0e
Lipc	-0.968757	5.16915	2.94998e-06	5.53018	-0.968757	#ff7f0e
Lfng	-0.672733	6.1765	2.94998e-06	5.53018	-0.672733	#ff7f0e
Fam213a	-0.625665	6.30424	2.94998e-06	5.53018	-0.625665	#ff7f0e
Fscn1	-0.312602	8.06665	3.00704e-06	5.52186	-0.312602	#ff7f0e
Plin3	-0.914967	5.26039	3.01515e-06	5.52069	-0.914967	#ff7f0e
Svbp	-0.4928	6.78431	3.038e-06	5.51741	-0.4928	#ff7f0e
Gpx8	-0.990553	5.30992	3.05774e-06	5.5146	-0.990553	#ff7f0e
Steap1	-0.545378	6.59098	3.21768e-06	5.49246	-0.545378	#ff7f0e
Rasgrp3	-0.731872	5.95794	3.58466e-06	5.44555	-0.731872	#ff7f0e
Col18a1	-0.552936	6.54472	4.70227e-06	5.32769	-0.552936	#ff7f0e
Zfp36l1	-1.01736	4.93335	5.23999e-06	5.28067	-1.01736	#ff7f0e
Adam10	-0.437379	7.11439	5.395e-06	5.26801	-0.437379	#ff7f0e
Pard3	-0.365998	7.54969	5.49432e-06	5.26009	-0.365998	#ff7f0e
Cdca7	-1.26596	4.37843	5.84727e-06	5.23305	-1.26596	#ff7f0e
Ccnd3	-0.318443	7.9267	6.62692e-06	5.17869	-0.318443	#ff7f0e
6330403K07Rik	-0.993229	5.13557	6.93792e-06	5.15877	-0.993229	#ff7f0e
Gsto1	-0.842355	5.39941	7.12182e-06	5.14741	-0.842355	#ff7f0e
Vps36	-0.453141	6.91591	7.24473e-06	5.13998	-0.453141	#ff7f0e
Cbx5	-0.411093	7.18441	7.4063e-06	5.1304	-0.411093	#ff7f0e
Capn6	-1.2902	4.33532	8.37238e-06	5.07715	-1.2902	#ff7f0e
Casp8ap2	-0.707493	5.85606	8.8011e-06	5.05546	-0.707493	#ff7f0e
Anxa5	-0.61709	6.18273	9.44e-06	5.02503	-0.61709	#ff7f0e
Rcc2	-0.495022	6.69654	9.66545e-06	5.01478	-0.495022	#ff7f0e
Tnfaip8	-0.734878	5.67173	9.675e-06	5.01435	-0.734878	#ff7f0e
Syne4	-0.705381	5.83036	9.70627e-06	5.01295	-0.705381	#ff7f0e
1700011H14Rik	-1.32472	4.22794	9.77156e-06	5.01004	-1.32472	#ff7f0e
Serpina6	-0.341185	7.67661	1.01676e-05	4.99278	-0.341185	#ff7f0e
Calu	-0.679295	5.9088	1.03073e-05	4.98685	-0.679295	#ff7f0e
Mfap2	-0.360152	7.51471	1.07209e-05	4.96977	-0.360152	#ff7f0e
Aldh2	-0.611013	6.15771	1.08096e-05	4.96619	-0.611013	#ff7f0e
Lrrn2	-0.477795	6.81363	1.12459e-05	4.949	-0.477795	#ff7f0e
Slc38a5	-0.359972	7.50383	1.18174e-05	4.92748	-0.359972	#ff7f0e
Kcne1l	-1.0816	4.68162	1.22228e-05	4.91283	-1.0816	#ff7f0e
Bst2	-0.880335	5.24789	1.39555e-05	4.85526	-0.880335	#ff7f0e
Tgm2	-0.822823	5.43228	1.66561e-05	4.77843	-0.822823	#ff7f0e
Mgst3	-0.715236	5.75041	1.66794e-05	4.77782	-0.715236	#ff7f0e
Ech1	-0.427452	6.99549	1.96815e-05	4.70594	-0.427452	#ff7f0e
Obscn	-0.889234	5.17106	2.20287e-05	4.65701	-0.889234	#ff7f0e
Prr5	-0.926	4.95098	2.21897e-05	4.65385	-0.926	#ff7f0e
Fam101b	-0.844004	5.27016	2.21897e-05	4.65385	-0.844004	#ff7f0e
Sept9	-0.752582	5.46706	2.64195e-05	4.57808	-0.752582	#ff7f0e
Gm266	-1.12155	4.50594	2.90719e-05	4.53653	-1.12155	#ff7f0e
Igf1r	-0.44866	6.79376	2.9186e-05	4.53482	-0.44866	#ff7f0e
Ifitm3	-0.487893	6.57669	3.02341e-05	4.5195	-0.487893	#ff7f0e
Vill	-1.36451	4.1373	3.04256e-05	4.51676	-1.36451	#ff7f0e
Smoc1	-0.897088	5.05482	3.48193e-05	4.45818	-0.897088	#ff7f0e
Spsb4	-0.357252	7.38857	3.54482e-05	4.45041	-0.357252	#ff7f0e
Fggy	-1.63325	3.63881	3.69352e-05	4.43256	-1.63325	#ff7f0e
Gusb	-0.612385	5.95446	4.0684e-05	4.39058	-0.612385	#ff7f0e
Khk	-0.970233	4.81512	4.07141e-05	4.39025	-0.970233	#ff7f0e
Sephs2	-0.425723	6.87039	4.08052e-05	4.38928	-0.425723	#ff7f0e
Hadh	-0.404151	7.00551	4.50133e-05	4.34666	-0.404151	#ff7f0e
Pdgfa	-0.504248	6.41074	4.55639e-05	4.34138	-0.504248	#ff7f0e
Macrod1	-0.905323	4.91521	5.11536e-05	4.29112	-0.905323	#ff7f0e
Ggt1	-1.4458	3.89016	6.13842e-05	4.21194	-1.4458	#ff7f0e
Sdsl	-0.583353	6.0216	6.13842e-05	4.21194	-0.583353	#ff7f0e
Hebp1	-1.05371	4.54133	6.21955e-05	4.20624	-1.05371	#ff7f0e
Gm8186	-0.505527	6.37488	6.82633e-05	4.16581	-0.505527	#ff7f0e
Tln2	-1.2955	4.06727	7.02212e-05	4.15353	-1.2955	#ff7f0e
Ptn	-0.641258	5.80939	7.12692e-05	4.1471	-0.641258	#ff7f0e
Eif4ebp1	-0.991508	4.62977	7.462e-05	4.12714	-0.991508	#ff7f0e
Ccnd1	-0.778713	5.33128	7.68844e-05	4.11416	-0.778713	#ff7f0e
5330417C22Rik	-0.576037	6.01854	7.75518e-05	4.11041	-0.576037	#ff7f0e
Pbld2	-0.76138	5.26754	7.98236e-05	4.09787	-0.76138	#ff7f0e
Gstp1	-0.475028	6.53553	0.00010708	3.97029	-0.475028	#ff7f0e
Mcm3	-0.516116	6.2211	0.000111203	3.95388	-0.516116	#ff7f0e
Mcm6	-0.493331	6.38039	0.000112217	3.94994	-0.493331	#ff7f0e
Afm	-1.03586	4.48328	0.000112462	3.94899	-1.03586	#ff7f0e
Casp8	-0.937975	4.75257	0.000114997	3.93931	-0.937975	#ff7f0e
Gstt1	-1.44739	3.80157	0.000120817	3.91787	-1.44739	#ff7f0e
Muc1	-0.607693	5.8675	0.000122475	3.91195	-0.607693	#ff7f0e
Fras1	-1.13341	4.27416	0.000124737	3.904	-1.13341	#ff7f0e
Tcf15	-0.673687	5.5721	0.000130353	3.88488	-0.673687	#ff7f0e
Slc38a4	-0.816602	5.09893	0.000132853	3.87663	-0.816602	#ff7f0e
Fzd2	-0.630795	5.78199	0.000133151	3.87565	-0.630795	#ff7f0e
Dact1	-0.814284	5.02493	0.000155988	3.80691	-0.814284	#ff7f0e
Kcnh7	-1.50752	3.68109	0.000168662	3.77298	-1.50752	#ff7f0e
Hebp2	-0.764716	5.19715	0.000175377	3.75603	-0.764716	#ff7f0e
Nacc1	-0.491318	6.27545	0.000175935	3.75465	-0.491318	#ff7f0e
Fgfr4	-0.647244	5.57588	0.000190437	3.72025	-0.647244	#ff7f0e
S100a16	-0.707933	5.41504	0.000190899	3.7192	-0.707933	#ff7f0e
Cat	-0.426913	6.69689	0.00019487	3.71026	-0.426913	#ff7f0e
Anxa11	-0.757996	5.18734	0.000196269	3.70715	-0.757996	#ff7f0e
Prss23	-1.05128	4.42413	0.00020947	3.67888	-1.05128	#ff7f0e
Ces1d	-0.988987	4.48025	0.00021076	3.67621	-0.988987	#ff7f0e
Decr1	-0.764995	5.13054	0.000216319	3.66491	-0.764995	#ff7f0e
Crip1	-0.843609	4.83849	0.000232807	3.633	-0.843609	#ff7f0e
Bco1	-0.758941	5.38727	0.000233608	3.63151	-0.758941	#ff7f0e
Sri	-0.332924	7.30409	0.000243132	3.61416	-0.332924	#ff7f0e
Ric1	-0.895393	4.68693	0.000246263	3.6086	-0.895393	#ff7f0e
F11r	-0.30668	7.53594	0.000246507	3.60817	-0.30668	#ff7f0e
Hnrnpa0	-0.401517	6.7663	0.000249871	3.60228	-0.401517	#ff7f0e
Vkorc1	-0.553345	6.02	0.000281315	3.55081	-0.553345	#ff7f0e
Ntpcr	-1.11269	4.16799	0.000285482	3.54442	-1.11269	#ff7f0e
Ndrg2	-0.781368	5.00471	0.000305823	3.51453	-0.781368	#ff7f0e
Gm8113	-0.522297	6.14149	0.000311281	3.50685	-0.522297	#ff7f0e
Rps12-ps3	-0.477724	6.25417	0.000312101	3.5057	-0.477724	#ff7f0e
Nynrin	-0.951002	4.59372	0.000314341	3.5026	-0.951002	#ff7f0e
Slc25a13	-0.83561	4.82681	0.000319284	3.49582	-0.83561	#ff7f0e
Aldh7a1	-0.454367	6.44926	0.000319284	3.49582	-0.454367	#ff7f0e
Lsm7	-0.383479	6.88749	0.000319284	3.49582	-0.383479	#ff7f0e
Akt1	-0.403502	6.70723	0.000333049	3.47749	-0.403502	#ff7f0e
Lgals1	-0.998498	4.47101	0.000338304	3.47069	-0.998498	#ff7f0e
Eid1	-0.312822	7.42326	0.000344926	3.46227	-0.312822	#ff7f0e
Degs1	-0.309809	7.43308	0.000382051	3.41788	-0.309809	#ff7f0e
C1qtnf6	-0.643519	5.46239	0.000425224	3.37138	-0.643519	#ff7f0e
Trf	-0.647258	5.51432	0.000447939	3.34878	-0.647258	#ff7f0e
Hrsp12	-0.440518	6.4101	0.00044806	3.34866	-0.440518	#ff7f0e
Hnf1aos1	-0.951475	4.61316	0.00046867	3.32913	-0.951475	#ff7f0e
Gtf3c1	-0.400552	6.69035	0.00046867	3.32913	-0.400552	#ff7f0e
Hyal2	-0.421495	6.52902	0.00047362	3.32457	-0.421495	#ff7f0e
Utrn	-1.02054	4.32218	0.000485069	3.3142	-1.02054	#ff7f0e
Rbms3	-0.492444	6.25967	0.000487216	3.31228	-0.492444	#ff7f0e
Ldha	-0.350385	7.03549	0.000492367	3.30771	-0.350385	#ff7f0e
Adamtsl2	-0.808387	4.91399	0.000505229	3.29651	-0.808387	#ff7f0e
Tmem54	-0.879007	4.66589	0.000543783	3.26457	-0.879007	#ff7f0e
Nucb1	-0.351368	7.00462	0.000561491	3.25066	-0.351368	#ff7f0e
Pamr1	-0.570471	5.89441	0.000596911	3.22409	-0.570471	#ff7f0e
Sppl3	-0.572439	5.73102	0.000598623	3.22285	-0.572439	#ff7f0e
Phyhip	-0.684267	5.21503	0.000646998	3.1891	-0.684267	#ff7f0e
Cgn	-0.99749	4.25503	0.000685813	3.16379	-0.99749	#ff7f0e
Efna2	-0.484559	6.14859	0.000749756	3.12508	-0.484559	#ff7f0e
Pwwp2a	-0.406297	6.5369	0.000762874	3.11755	-0.406297	#ff7f0e
Tubb6	-1.21821	3.86364	0.000778638	3.10866	-1.21821	#ff7f0e
Gcsh	-0.524132	5.85733	0.000785554	3.10482	-0.524132	#ff7f0e
Id3	-0.748874	4.90828	0.00081674	3.08792	-0.748874	#ff7f0e
Tst	-0.970746	4.33085	0.000860992	3.065	-0.970746	#ff7f0e
Pla2g16	-0.635623	5.33657	0.000877346	3.05683	-0.635623	#ff7f0e
Gm2a	-0.927424	4.36433	0.000914882	3.03864	-0.927424	#ff7f0e
E2f1	-0.361749	6.86098	0.000931593	3.03077	-0.361749	#ff7f0e
Bhmt2	-0.851485	4.71647	0.000939075	3.0273	-0.851485	#ff7f0e
Hells	-0.647127	5.25743	0.00101933	2.99168	-0.647127	#ff7f0e
Cep164	-0.607383	5.3953	0.00102013	2.99134	-0.607383	#ff7f0e
Bmp7	-0.765294	4.8289	0.00102368	2.98983	-0.765294	#ff7f0e
Sept2	-0.30006	7.33896	0.00103031	2.98703	-0.30006	#ff7f0e
Igdcc4	-0.788593	4.72694	0.0010911	2.96214	-0.788593	#ff7f0e
Acot2	-0.801132	4.82651	0.00110906	2.95504	-0.801132	#ff7f0e
Pxdn	-0.619839	5.51386	0.00110906	2.95504	-0.619839	#ff7f0e
Pfas	-0.759812	4.80481	0.0011179	2.9516	-0.759812	#ff7f0e
Cryz	-0.636286	5.30459	0.00112861	2.94745	-0.636286	#ff7f0e
Cdk2	-0.633859	5.23743	0.00113654	2.94441	-0.633859	#ff7f0e
Pcbd2	-0.466559	6.14581	0.00114765	2.94019	-0.466559	#ff7f0e
Lifr	-1.12983	3.82795	0.0011804	2.92797	-1.12983	#ff7f0e
Cln5	-0.91721	4.49588	0.00121433	2.91566	-0.91721	#ff7f0e
Nradd	-0.966859	4.29304	0.00128984	2.88946	-0.966859	#ff7f0e
Dctpp1	-0.332827	6.99435	0.00129948	2.88623	-0.332827	#ff7f0e
Ccnb2	-0.638822	5.61111	0.00130059	2.88586	-0.638822	#ff7f0e
Sh3bgrl	-0.338748	6.93908	0.00132388	2.87815	-0.338748	#ff7f0e
Ptch1	-0.537042	5.66911	0.0013477	2.87041	-0.537042	#ff7f0e
Rnd3	-0.768935	4.76435	0.00140548	2.85218	-0.768935	#ff7f0e
Efhd2	-0.337444	6.9327	0.00143863	2.84205	-0.337444	#ff7f0e
Echdc1	-0.762146	4.70905	0.00144223	2.84097	-0.762146	#ff7f0e
Nr4a2	-0.769637	4.75658	0.00144766	2.83933	-0.769637	#ff7f0e
Tfpi	-0.931727	4.20945	0.0015957	2.79705	-0.931727	#ff7f0e
Sept11	-0.679018	4.98658	0.0015957	2.79705	-0.679018	#ff7f0e
Sptssa	-0.355872	6.75948	0.0015957	2.79705	-0.355872	#ff7f0e
Ptgfrn	-1.09165	3.90182	0.00161221	2.79258	-1.09165	#ff7f0e
Slc39a1	-0.614189	5.27697	0.00162261	2.78979	-0.614189	#ff7f0e
5730559C18Rik	-0.875195	4.38234	0.0017061	2.768	-0.875195	#ff7f0e
Mthfd1	-0.704034	4.98761	0.00171631	2.7654	-0.704034	#ff7f0e
Pcolce	-0.507436	5.78133	0.00172415	2.76342	-0.507436	#ff7f0e
Smo	-0.641623	5.14722	0.0017245	2.76334	-0.641623	#ff7f0e
Fam73a	-0.780461	4.62705	0.00180942	2.74246	-0.780461	#ff7f0e
Tns1	-1.09079	3.85269	0.00181636	2.7408	-1.09079	#ff7f0e
Fgf12	-1.10371	3.87085	0.0018733	2.72739	-1.10371	#ff7f0e
Kank1	-1.17596	3.89859	0.00188094	2.72563	-1.17596	#ff7f0e
Nrp1	-0.935891	4.25734	0.00189689	2.72196	-0.935891	#ff7f0e
Dusp23	-0.654899	5.09364	0.0018979	2.72173	-0.654899	#ff7f0e
Ass1	-0.570908	5.47528	0.00191806	2.71714	-0.570908	#ff7f0e
Enc1	-0.349046	6.76454	0.00199247	2.70061	-0.349046	#ff7f0e
Ifi30	-0.744522	4.75872	0.00201325	2.6961	-0.744522	#ff7f0e
Rcbtb2	-0.358692	6.68466	0.00201325	2.6961	-0.358692	#ff7f0e
Gsg1l	-0.968867	4.14642	0.00201966	2.69472	-0.968867	#ff7f0e
Nfix	-0.410514	6.30133	0.00201966	2.69472	-0.410514	#ff7f0e
Hscb	-0.75505	4.72518	0.00205592	2.68699	-0.75505	#ff7f0e
Tmem119	-0.873584	4.36633	0.00211597	2.67449	-0.873584	#ff7f0e
Efemp2	-0.546382	5.55074	0.00214874	2.66782	-0.546382	#ff7f0e
Smyd3	-0.964403	4.17146	0.00216116	2.66531	-0.964403	#ff7f0e
Rbp4	-0.337021	6.83715	0.0022384	2.65006	-0.337021	#ff7f0e
D630039A03Rik	-0.771948	4.62602	0.00224893	2.64802	-0.771948	#ff7f0e
Cd99l2	-0.61131	5.17998	0.00228681	2.64077	-0.61131	#ff7f0e
Pgk1	-0.561672	5.52099	0.0023046	2.6374	-0.561672	#ff7f0e
Ldlrap1	-0.834223	4.4494	0.00231236	2.63594	-0.834223	#ff7f0e
Mmgt2	-0.558667	5.52728	0.00237015	2.62522	-0.558667	#ff7f0e
Afp	-1.1024	3.74988	0.00237987	2.62345	-1.1024	#ff7f0e
Acot7	-1.00233	3.98737	0.00237987	2.62345	-1.00233	#ff7f0e
Tcf20	-0.466371	5.96805	0.00239066	2.62148	-0.466371	#ff7f0e
Elmo2	-1.08993	3.75724	0.0025694	2.59017	-1.08993	#ff7f0e
Wsb1	-0.317665	6.97241	0.0025694	2.59017	-0.317665	#ff7f0e
St6gal1	-1.10812	3.72216	0.00258526	2.5875	-1.10812	#ff7f0e
Cdc42ep5	-1.04702	3.8818	0.00261759	2.5821	-1.04702	#ff7f0e
Chadl	-0.890966	4.21085	0.00270765	2.56741	-0.890966	#ff7f0e
Fat4	-1.02864	3.87143	0.002876	2.54121	-1.02864	#ff7f0e
Ctsh	-0.537775	5.54211	0.002876	2.54121	-0.537775	#ff7f0e
Hmga2	-0.423885	6.14704	0.0029426	2.53127	-0.423885	#ff7f0e
Steap2	-0.472595	5.89431	0.00307578	2.51205	-0.472595	#ff7f0e
Fam181b	-0.935015	4.0859	0.00308234	2.51112	-0.935015	#ff7f0e
Rasl11b	-0.314734	6.95586	0.00309133	2.50985	-0.314734	#ff7f0e
Adi1	-0.748943	4.65477	0.00320516	2.49415	-0.748943	#ff7f0e
Hn1l	-0.459936	5.88867	0.00320516	2.49415	-0.459936	#ff7f0e
Snhg18	-0.745398	4.69582	0.00321237	2.49317	-0.745398	#ff7f0e
Wls	-0.797426	4.45429	0.00321841	2.49236	-0.797426	#ff7f0e
Irf9	-0.713557	4.76172	0.00331726	2.47922	-0.713557	#ff7f0e
Zmynd8	-0.343066	6.69233	0.003322	2.4786	-0.343066	#ff7f0e
Tead1	-0.546572	5.4042	0.00332454	2.47827	-0.546572	#ff7f0e
Sfxn1	-0.36355	6.52398	0.0033708	2.47227	-0.36355	#ff7f0e
Adcy5	-0.892187	4.20557	0.00341725	2.46632	-0.892187	#ff7f0e
Chst1	-0.743589	4.6138	0.00342424	2.46544	-0.743589	#ff7f0e
Ezr	-0.42902	6.05764	0.00344824	2.4624	-0.42902	#ff7f0e
As3mt	-0.457616	5.92197	0.00345035	2.46214	-0.457616	#ff7f0e
Aldh9a1	-0.662152	4.994	0.0034549	2.46156	-0.662152	#ff7f0e
Gstm5	-0.317686	6.89841	0.00347555	2.45898	-0.317686	#ff7f0e
Srek1ip1	-0.349345	6.6245	0.00353211	2.45197	-0.349345	#ff7f0e
Vtn	-0.721036	4.69447	0.00366451	2.43598	-0.721036	#ff7f0e
Ralgapa2	-0.817077	4.39264	0.00379268	2.42105	-0.817077	#ff7f0e
Bcl2l12	-0.533773	5.47302	0.00392354	2.40632	-0.533773	#ff7f0e
Lage3	-0.314907	6.89416	0.00392354	2.40632	-0.314907	#ff7f0e
Sepp1	-0.390364	6.28052	0.00399295	2.39871	-0.390364	#ff7f0e
Fgfr1	-0.629303	5.05178	0.00403654	2.39399	-0.629303	#ff7f0e
Sh3glb2	-0.448006	5.90906	0.00415261	2.38168	-0.448006	#ff7f0e
Cdc42ep3	-0.673289	4.81398	0.00423279	2.37337	-0.673289	#ff7f0e
Psmb10	-0.891586	4.14861	0.00426251	2.37033	-0.891586	#ff7f0e
Adk	-0.520449	5.52254	0.00429225	2.36731	-0.520449	#ff7f0e
Dcps	-0.351641	6.56052	0.00430499	2.36603	-0.351641	#ff7f0e
Adamts1	-0.751807	4.65187	0.00432115	2.3644	-0.751807	#ff7f0e
Lgals3bp	-0.657217	4.86179	0.00435907	2.36061	-0.657217	#ff7f0e
Atxn1	-0.839255	4.32782	0.00443791	2.35282	-0.839255	#ff7f0e
Pgm2	-0.808131	4.44847	0.00446458	2.35022	-0.808131	#ff7f0e
Gdf11	-0.550995	5.33316	0.00453539	2.34339	-0.550995	#ff7f0e
Rbm24	-0.797149	4.51161	0.0045985	2.33738	-0.797149	#ff7f0e
B2m	-0.464371	5.8763	0.00464681	2.33285	-0.464371	#ff7f0e
Hif1a	-0.34532	6.58623	0.00470962	2.32701	-0.34532	#ff7f0e
Mesdc2	-0.337831	6.64473	0.00478043	2.32053	-0.337831	#ff7f0e
Myl9	-0.783594	4.49973	0.0048376	2.31537	-0.783594	#ff7f0e
Naaa	-1.04541	3.84399	0.00492446	2.30764	-1.04541	#ff7f0e
Lrrc10b	-0.493553	5.59353	0.00492474	2.30762	-0.493553	#ff7f0e
Mxra7	-0.881113	4.1386	0.00546434	2.26246	-0.881113	#ff7f0e
Camk1	-0.457085	5.75793	0.00546732	2.26223	-0.457085	#ff7f0e
Dusp9	-0.756713	4.46347	0.00554079	2.25643	-0.756713	#ff7f0e
Plscr1	-0.423991	5.95044	0.00585799	2.23225	-0.423991	#ff7f0e
Vat1	-0.47797	5.63219	0.00607255	2.21663	-0.47797	#ff7f0e
Csad	-0.602388	5.08945	0.00638518	2.19483	-0.602388	#ff7f0e
Nkd1	-0.540158	5.34461	0.00679924	2.16754	-0.540158	#ff7f0e
Rassf7	-0.395115	6.11808	0.00680771	2.167	-0.395115	#ff7f0e
Spr	-0.351548	6.48517	0.00717677	2.14407	-0.351548	#ff7f0e
St14	-0.480079	5.5803	0.00732155	2.1354	-0.480079	#ff7f0e
Agt	-0.594026	5.05921	0.00762664	2.11767	-0.594026	#ff7f0e
Zfp105	-0.534701	5.23493	0.00788477	2.10321	-0.534701	#ff7f0e
Lrp8os2	-0.800656	4.23554	0.00800529	2.09662	-0.800656	#ff7f0e
Cmtm8	-0.964327	3.76912	0.00801731	2.09597	-0.964327	#ff7f0e
Tekt1	-0.524299	5.27489	0.00801731	2.09597	-0.524299	#ff7f0e
Chaf1b	-0.637068	4.77944	0.00805799	2.09377	-0.637068	#ff7f0e
Ephb4	-1.04159	3.65348	0.00814375	2.08918	-1.04159	#ff7f0e
Spg20	-0.616263	4.86249	0.0082736	2.08231	-0.616263	#ff7f0e
Hprt	-0.317901	6.67107	0.0082736	2.08231	-0.317901	#ff7f0e
Rab4a	-0.750736	4.33917	0.008297	2.08108	-0.750736	#ff7f0e
Pttg1	-0.358346	6.40394	0.00830522	2.08065	-0.358346	#ff7f0e
Gamt	-0.410813	5.94348	0.00836065	2.07776	-0.410813	#ff7f0e
B4galt1	-0.422317	5.85389	0.00870521	2.06022	-0.422317	#ff7f0e
Mcee	-0.321363	6.62548	0.00870838	2.06006	-0.321363	#ff7f0e
Fuca2	-0.642804	4.82419	0.00936515	2.02849	-0.642804	#ff7f0e
Serpinf2	-0.712165	4.45453	0.00983841	2.00707	-0.712165	#ff7f0e
Scrn2	-0.590788	5.01899	0.010025	1.99892	-0.590788	#ff7f0e
Mmp11	-0.865202	3.98244	0.0101048	1.99547	-0.865202	#ff7f0e
Wdsub1	-0.818767	4.10463	0.0101444	1.99377	-0.818767	#ff7f0e
Pycard	-0.714213	4.6495	0.0101679	1.99277	-0.714213	#ff7f0e
Frmd4b	-0.681892	4.53654	0.0103499	1.98506	-0.681892	#ff7f0e
Ggh	-0.347816	6.34754	0.0104634	1.98033	-0.347816	#ff7f0e
Isoc1	-0.644392	4.65886	0.0104791	1.97968	-0.644392	#ff7f0e
St3gal1	-0.541633	5.14996	0.0105646	1.97615	-0.541633	#ff7f0e
Ldhb	-0.790673	4.22371	0.010573	1.9758	-0.790673	#ff7f0e
Msto1	-0.542229	5.20697	0.0105929	1.97499	-0.542229	#ff7f0e
Pou3f1	-0.340384	6.39849	0.0108134	1.96604	-0.340384	#ff7f0e
Gstt2	-0.844841	3.97594	0.0111071	1.9544	-0.844841	#ff7f0e
Fbxo36	-0.811098	4.32786	0.0114738	1.94029	-0.811098	#ff7f0e
Tmem55a	-0.381702	6.05636	0.0115133	1.9388	-0.381702	#ff7f0e
Rnf122	-0.706567	4.43458	0.0117525	1.92987	-0.706567	#ff7f0e
Gas2	-0.885336	3.93425	0.0117595	1.92961	-0.885336	#ff7f0e
Calml4	-0.550907	5.05095	0.0119813	1.92149	-0.550907	#ff7f0e
Pacsin3	-0.728085	4.34997	0.0122609	1.91148	-0.728085	#ff7f0e
Uap1	-0.394895	6.0481	0.0124985	1.90314	-0.394895	#ff7f0e
Dab2ip	-0.484892	5.35865	0.0125924	1.89989	-0.484892	#ff7f0e
Acadm	-0.446739	5.61121	0.012615	1.89911	-0.446739	#ff7f0e
Acat2	-0.384476	6.00539	0.0126712	1.89718	-0.384476	#ff7f0e
Tmem216	-0.457949	5.60821	0.0126801	1.89688	-0.457949	#ff7f0e
4931406C07Rik	-0.60549	4.74987	0.0133354	1.87499	-0.60549	#ff7f0e
Pih1d2	-0.940324	3.67435	0.0137466	1.8618	-0.940324	#ff7f0e
Shisa2	-0.500329	5.33235	0.0138205	1.85948	-0.500329	#ff7f0e
Scly	-0.314598	6.5459	0.0138205	1.85948	-0.314598	#ff7f0e
Kdsr	-0.477827	5.3662	0.0140025	1.8538	-0.477827	#ff7f0e
Tcn2	-0.365673	6.11074	0.0142625	1.84581	-0.365673	#ff7f0e
Donson	-0.540776	5.04396	0.0147227	1.83201	-0.540776	#ff7f0e
Hsdl2	-0.435943	5.60589	0.0147557	1.83104	-0.435943	#ff7f0e
Greb1	-0.864039	3.86166	0.0155976	1.80694	-0.864039	#ff7f0e
Plbd2	-0.361706	6.11302	0.0156543	1.80537	-0.361706	#ff7f0e
Tnrc6c	-0.340408	6.28326	0.0157174	1.80362	-0.340408	#ff7f0e
Dtl	-0.672874	4.45602	0.015798	1.8014	-0.672874	#ff7f0e
Mcm4	-0.374271	6.02055	0.0161218	1.79259	-0.374271	#ff7f0e
Aldoc	-0.528638	5.07643	0.0162036	1.79039	-0.528638	#ff7f0e
Rell1	-0.549232	4.9796	0.0162852	1.78821	-0.549232	#ff7f0e
Knstrn	-0.481	5.46013	0.0165923	1.78009	-0.481	#ff7f0e
Dlgap5	-0.941098	3.81908	0.0168204	1.77416	-0.941098	#ff7f0e
Abcc8	-0.42296	5.68442	0.016901	1.77209	-0.42296	#ff7f0e
Arrdc1	-0.533875	4.99802	0.0171943	1.76462	-0.533875	#ff7f0e
Pole4	-0.335513	6.2936	0.017335	1.76108	-0.335513	#ff7f0e
Diaph1	-0.437469	5.6566	0.0177969	1.74966	-0.437469	#ff7f0e
Hddc2	-0.428904	5.64681	0.0178124	1.74928	-0.428904	#ff7f0e
Iffo2	-0.348876	6.17345	0.0178731	1.7478	-0.348876	#ff7f0e
Tmem14a	-0.871095	3.79324	0.0180062	1.74458	-0.871095	#ff7f0e
Krt10	-0.364975	6.04238	0.018007	1.74456	-0.364975	#ff7f0e
Phgdh	-0.335483	6.27657	0.0184333	1.7344	-0.335483	#ff7f0e
Nkpd1	-0.66417	4.47314	0.0184382	1.73428	-0.66417	#ff7f0e
Pno1	-0.302308	6.56243	0.0187772	1.72637	-0.302308	#ff7f0e
Tspo	-0.492249	5.19002	0.0189517	1.72235	-0.492249	#ff7f0e
Pkp4	-0.850369	3.81424	0.0190673	1.71971	-0.850369	#ff7f0e
2810006K23Rik	-0.620632	4.56762	0.0190673	1.71971	-0.620632	#ff7f0e
Fndc3b	-0.774042	4.06378	0.0190875	1.71925	-0.774042	#ff7f0e
Shox2	-0.765573	4.19629	0.0192737	1.71503	-0.765573	#ff7f0e
Cd2ap	-0.376088	5.93472	0.0193011	1.71442	-0.376088	#ff7f0e
Tm7sf3	-0.595485	4.66186	0.0210886	1.67595	-0.595485	#ff7f0e
Idi1	-0.541232	4.8922	0.0212523	1.67259	-0.541232	#ff7f0e
Nmb	-0.758635	4.16861	0.0215692	1.66617	-0.758635	#ff7f0e
Bid	-0.63196	4.60092	0.0215692	1.66617	-0.63196	#ff7f0e
Add3	-0.546211	4.88572	0.0215692	1.66617	-0.546211	#ff7f0e
Sptbn1	-0.378608	5.87812	0.0216691	1.66416	-0.378608	#ff7f0e
Gm4890	-0.859075	3.8183	0.0220648	1.6563	-0.859075	#ff7f0e
Mettl21a	-0.441052	5.44399	0.0221182	1.65525	-0.441052	#ff7f0e
Fignl2	-0.8557	3.77652	0.0221893	1.65386	-0.8557	#ff7f0e
Higd1a	-0.312002	6.41481	0.0223393	1.65093	-0.312002	#ff7f0e
Accs	-0.903816	3.67441	0.0223481	1.65076	-0.903816	#ff7f0e
Gm12942	-0.541212	4.87438	0.0223481	1.65076	-0.541212	#ff7f0e
Tenm4	-0.488557	5.15599	0.0223481	1.65076	-0.488557	#ff7f0e
Cdt1	-0.633411	4.58725	0.0223499	1.65072	-0.633411	#ff7f0e
Wnt9a	-0.599367	4.65953	0.0225563	1.64673	-0.599367	#ff7f0e
Sipa1l3	-0.529046	4.92874	0.0227913	1.64223	-0.529046	#ff7f0e
Net1	-0.661067	4.34671	0.0234985	1.62896	-0.661067	#ff7f0e
Snrnp25	-0.375979	5.86266	0.0238938	1.62171	-0.375979	#ff7f0e
Ush1c	-0.770664	4.03048	0.0240056	1.61969	-0.770664	#ff7f0e
Kank2	-0.510688	5.00663	0.0240782	1.61838	-0.510688	#ff7f0e
Flnb	-0.750118	4.05409	0.0241354	1.61734	-0.750118	#ff7f0e
Polr3d	-0.367722	5.95634	0.0247729	1.60602	-0.367722	#ff7f0e
Skp2	-0.736897	4.07662	0.0247749	1.60599	-0.736897	#ff7f0e
Srxn1	-0.451811	5.37144	0.0251949	1.59869	-0.451811	#ff7f0e
Cand2	-0.732142	4.11329	0.0253781	1.59554	-0.732142	#ff7f0e
Fcho2	-0.493019	5.09728	0.0253781	1.59554	-0.493019	#ff7f0e
Vldlr	-0.39965	5.67982	0.0254277	1.59469	-0.39965	#ff7f0e
Col11a2	-0.363461	5.92858	0.0256928	1.59019	-0.363461	#ff7f0e
Ints7	-0.500519	5.03587	0.0257079	1.58993	-0.500519	#ff7f0e
Mcmbp	-0.314172	6.33706	0.0258905	1.58686	-0.314172	#ff7f0e
Mcm5	-0.360154	5.93953	0.0266428	1.57442	-0.360154	#ff7f0e
Dcaf13	-0.346386	6.2079	0.0269059	1.57015	-0.346386	#ff7f0e
Sept6	-0.892063	3.76504	0.0270757	1.56742	-0.892063	#ff7f0e
Magt1	-0.328821	6.24545	0.0276859	1.55774	-0.328821	#ff7f0e
Sbsn	-0.462222	5.32322	0.0282349	1.54921	-0.462222	#ff7f0e
Mettl6	-0.345172	6.03733	0.0282349	1.54921	-0.345172	#ff7f0e
Pacrg	-0.644139	4.37874	0.0298222	1.52546	-0.644139	#ff7f0e
Appl2	-0.552329	4.78103	0.0305875	1.51446	-0.552329	#ff7f0e
Stard3nl	-0.345251	6.03082	0.0312399	1.50529	-0.345251	#ff7f0e
Bag3	-0.780033	3.8857	0.0313015	1.50443	-0.780033	#ff7f0e
Traf3	-0.674651	4.19579	0.0317602	1.49812	-0.674651	#ff7f0e
Cast	-0.6629	4.23487	0.0318834	1.49644	-0.6629	#ff7f0e
Med18	-0.602729	4.466	0.032899	1.48282	-0.602729	#ff7f0e
Pabpc4	-0.302466	6.42125	0.0331338	1.47973	-0.302466	#ff7f0e
Slc4a1	-0.776661	3.89813	0.0332444	1.47828	-0.776661	#ff7f0e
Map2k3	-0.508219	4.8995	0.0332616	1.47806	-0.508219	#ff7f0e
Pam	-0.402351	5.54195	0.0333956	1.47631	-0.402351	#ff7f0e
Cirh1a	-0.355717	5.88607	0.0334791	1.47523	-0.355717	#ff7f0e
Trip10	-0.764232	3.88347	0.0335009	1.47494	-0.764232	#ff7f0e
Srrd	-0.34036	6.06975	0.0337519	1.4717	-0.34036	#ff7f0e
Opn3	-0.840634	3.72824	0.0337592	1.47161	-0.840634	#ff7f0e
Alg6	-0.697724	4.1437	0.0341473	1.46664	-0.697724	#ff7f0e
Rpap3	-0.446233	5.24891	0.0341473	1.46664	-0.446233	#ff7f0e
Rnf135	-0.470732	5.09176	0.0344644	1.46263	-0.470732	#ff7f0e
Idh1	-0.342397	5.99145	0.03476	1.45892	-0.342397	#ff7f0e
Nqo2	-0.770971	3.91434	0.0352932	1.45231	-0.770971	#ff7f0e
Sft2d2	-0.408866	5.47128	0.0354478	1.45041	-0.408866	#ff7f0e
Kctd14	-0.762475	3.90341	0.0357001	1.44733	-0.762475	#ff7f0e
Ppat	-0.546346	4.67927	0.0357001	1.44733	-0.546346	#ff7f0e
Nacc2	-0.376524	5.74769	0.0357001	1.44733	-0.376524	#ff7f0e			List of downregulated genes in Ndrfhigh cells compared to Ndrflow/- cells from Bastidas-Ponce et al., 2019.
Cenpa	-0.36886	5.98326	0.0357083	1.44723	-0.36886	#ff7f0e
Aamdc	-0.438227	5.26405	0.0367133	1.43518	-0.438227	#ff7f0e
Sphk1	-0.684422	4.11438	0.0371197	1.4304	-0.684422	#ff7f0e
Gsta4	-0.805591	3.76466	0.0373779	1.42739	-0.805591	#ff7f0e
Nmi	-0.692744	4.0699	0.0374309	1.42677	-0.692744	#ff7f0e
Itm2a	-0.526422	4.75629	0.0375374	1.42554	-0.526422	#ff7f0e
Rnf168	-0.518597	4.7849	0.038015	1.42005	-0.518597	#ff7f0e
Mms22l	-0.642327	4.27407	0.0383832	1.41586	-0.642327	#ff7f0e
Ung	-0.595919	4.51328	0.0383832	1.41586	-0.595919	#ff7f0e
Bub1b	-0.741057	4.00146	0.0384052	1.41561	-0.741057	#ff7f0e
Srgap1	-0.668147	4.23158	0.0387273	1.41198	-0.668147	#ff7f0e
Stx1a	-0.517765	4.79925	0.0392777	1.40585	-0.517765	#ff7f0e
Psph	-0.441321	5.21523	0.0392777	1.40585	-0.441321	#ff7f0e
Iah1	-0.357544	5.82228	0.0392777	1.40585	-0.357544	#ff7f0e
Nnt	-0.368974	5.80044	0.0392952	1.40566	-0.368974	#ff7f0e
Sumf2	-0.409641	5.41684	0.0397376	1.4008	-0.409641	#ff7f0e
Gjc1	-0.459298	5.11237	0.0399335	1.39866	-0.459298	#ff7f0e
Wrb	-0.757565	3.90674	0.0399517	1.39847	-0.757565	#ff7f0e
Rrp15	-0.384436	5.60206	0.0399517	1.39847	-0.384436	#ff7f0e
Zfp213	-0.531239	4.73938	0.040056	1.39733	-0.531239	#ff7f0e
Mov10	-0.499098	4.85723	0.041037	1.38682	-0.499098	#ff7f0e
Gna12	-0.542464	4.62791	0.0411237	1.38591	-0.542464	#ff7f0e
Ctdspl	-0.635549	4.268	0.0411561	1.38557	-0.635549	#ff7f0e
Hpn	-0.360634	5.75416	0.0414986	1.38197	-0.360634	#ff7f0e
Plod2	-0.535815	4.74069	0.0416936	1.37993	-0.535815	#ff7f0e
Tnip1	-0.430277	5.25762	0.0417881	1.37895	-0.430277	#ff7f0e
Tfdp2	-0.406932	5.41212	0.0418183	1.37863	-0.406932	#ff7f0e
Ppif	-0.390463	5.52653	0.0418735	1.37806	-0.390463	#ff7f0e
2900093K20Rik	-0.591908	4.53628	0.042047	1.37627	-0.591908	#ff7f0e
Plin2	-0.342668	5.88677	0.0424615	1.37201	-0.342668	#ff7f0e
Rbms2	-0.452851	5.16859	0.0426491	1.37009	-0.452851	#ff7f0e
Glt8d1	-0.370953	5.65981	0.0427706	1.36885	-0.370953	#ff7f0e
Itpr3	-0.387403	5.53738	0.0428811	1.36773	-0.387403	#ff7f0e
Proser3	-0.586903	4.42549	0.0433893	1.36262	-0.586903	#ff7f0e
Pnck	-0.49138	4.87023	0.0436464	1.36005	-0.49138	#ff7f0e
Rpusd1	-0.507979	4.83661	0.0436969	1.35955	-0.507979	#ff7f0e
Gaa	-0.319456	6.07055	0.0437193	1.35933	-0.319456	#ff7f0e
Zfp639	-0.448638	5.11785	0.0439152	1.35738	-0.448638	#ff7f0e
Tmem260	-0.671517	4.05374	0.0446249	1.35042	-0.671517	#ff7f0e
Dtnbp1	-0.415826	5.42934	0.044785	1.34887	-0.415826	#ff7f0e
Homer3	-0.333365	5.93603	0.0451848	1.34501	-0.333365	#ff7f0e
Med23	-0.519988	4.69898	0.0453252	1.34366	-0.519988	#ff7f0e
Dido1	-0.357696	5.73088	0.0458843	1.33834	-0.357696	#ff7f0e
Nudt19	-0.313806	6.09575	0.0463591	1.33386	-0.313806	#ff7f0e
Smarca2	-0.304877	6.17421	0.0466419	1.33122	-0.304877	#ff7f0e
Hmgcs1	-0.319166	6.03461	0.0477914	1.32065	-0.319166	#ff7f0e
Gstm2	-0.508173	4.73737	0.0480014	1.31875	-0.508173	#ff7f0e
Creg1	-0.321226	6.01412	0.0480014	1.31875	-0.321226	#ff7f0e
Zc3hav1l	-0.508461	4.74424	0.0481714	1.31721	-0.508461	#ff7f0e
Atic	-0.351389	5.79143	0.0481714	1.31721	-0.351389	#ff7f0e
Gins2	-0.452758	5.04182	0.0493775	1.30647	-0.452758	#ff7f0e

## Sheet: Pathway Enrichment_Upregulated
GroupID	Category	Term	Description	LogP	Log(q-value)	Genes	Symbols	InTerm_InList
1_Summary	GO Biological Processes	GO:0031175	neuron projection development	-14.6438	-10.2952	885,1600,1889,1944,1996,3670,3725,3800,3975,4131,4204,4760,4761,4884,5063,5530,5864,6585,6812,7345,7832,8811,9638,10381,22911,23237,23542,23769,25861,26999,29993,51347,55558,56896,65059,133418,201191,2038,2195,9181,57619,2314,1113,2905,3570,3815,5228	CCK,DAB1,ECE1,EFNA3,ELAVL4,ISL1,JUN,KIF5C,LHX1,MAP1B,MECP2,NEUROD1,NEUROD2,NPTX1,PAK3,PPP3CA,RAB3A,SLIT1,STXBP1,UCHL1,BTG2,GALR2,FEZ1,TUBB3,WDR47,ARC,MAPK8IP2,FLRT1,WHRN,CYFIP2,PACSIN1,TAOK3,PLXNA3,DPYSL5,RAPH1,EMB,SAMD14,EPB42,FAT1,ARHGEF2,SHROOM3,FLII,CHGA,GRIN2C,IL6R,KIT,PGF	47/-
1_Member	GO Biological Processes	GO:0031175	neuron projection development	-14.6438	-10.2952	885,1600,1889,1944,1996,3670,3725,3800,3975,4131,4204,4760,4761,4884,5063,5530,5864,6585,6812,7345,7832,8811,9638,10381,22911,23237,23542,23769,25861,26999,29993,51347,55558,56896,65059,133418,201191	CCK,DAB1,ECE1,EFNA3,ELAVL4,ISL1,JUN,KIF5C,LHX1,MAP1B,MECP2,NEUROD1,NEUROD2,NPTX1,PAK3,PPP3CA,RAB3A,SLIT1,STXBP1,UCHL1,BTG2,GALR2,FEZ1,TUBB3,WDR47,ARC,MAPK8IP2,FLRT1,WHRN,CYFIP2,PACSIN1,TAOK3,PLXNA3,DPYSL5,RAPH1,EMB,SAMD14	37/670
1_Member	GO Biological Processes	GO:0048812	neuron projection morphogenesis	-12.8915	-9.0278	885,1600,1889,1944,1996,3670,3800,3975,4131,4884,5063,5530,5864,6585,6812,7345,9638,10381,22911,23237,23542,23769,26999,29993,51347,55558,56896,65059,133418	CCK,DAB1,ECE1,EFNA3,ELAVL4,ISL1,KIF5C,LHX1,MAP1B,NPTX1,PAK3,PPP3CA,RAB3A,SLIT1,STXBP1,UCHL1,FEZ1,TUBB3,WDR47,ARC,MAPK8IP2,FLRT1,CYFIP2,PACSIN1,TAOK3,PLXNA3,DPYSL5,RAPH1,EMB	29/464
1_Member	GO Biological Processes	GO:0000902	cell morphogenesis	-12.789	-9.0278	885,1600,1889,1944,1996,2038,2195,3670,3800,3975,4131,4884,5063,5530,5864,6585,6812,7345,9181,9638,10381,22911,23237,23542,23769,25861,26999,29993,51347,55558,56896,57619,65059,133418	CCK,DAB1,ECE1,EFNA3,ELAVL4,EPB42,FAT1,ISL1,KIF5C,LHX1,MAP1B,NPTX1,PAK3,PPP3CA,RAB3A,SLIT1,STXBP1,UCHL1,ARHGEF2,FEZ1,TUBB3,WDR47,ARC,MAPK8IP2,FLRT1,WHRN,CYFIP2,PACSIN1,TAOK3,PLXNA3,DPYSL5,SHROOM3,RAPH1,EMB	34/651
1_Member	GO Biological Processes	GO:0120039	plasma membrane bounded cell projection morphogenesis	-12.7743	-9.0278	885,1600,1889,1944,1996,3670,3800,3975,4131,4884,5063,5530,5864,6585,6812,7345,9638,10381,22911,23237,23542,23769,26999,29993,51347,55558,56896,65059,133418	CCK,DAB1,ECE1,EFNA3,ELAVL4,ISL1,KIF5C,LHX1,MAP1B,NPTX1,PAK3,PPP3CA,RAB3A,SLIT1,STXBP1,UCHL1,FEZ1,TUBB3,WDR47,ARC,MAPK8IP2,FLRT1,CYFIP2,PACSIN1,TAOK3,PLXNA3,DPYSL5,RAPH1,EMB	29/469
1_Member	GO Biological Processes	GO:0048858	cell projection morphogenesis	-12.6586	-9.00905	885,1600,1889,1944,1996,3670,3800,3975,4131,4884,5063,5530,5864,6585,6812,7345,9638,10381,22911,23237,23542,23769,26999,29993,51347,55558,56896,65059,133418	CCK,DAB1,ECE1,EFNA3,ELAVL4,ISL1,KIF5C,LHX1,MAP1B,NPTX1,PAK3,PPP3CA,RAB3A,SLIT1,STXBP1,UCHL1,FEZ1,TUBB3,WDR47,ARC,MAPK8IP2,FLRT1,CYFIP2,PACSIN1,TAOK3,PLXNA3,DPYSL5,RAPH1,EMB	29/474
1_Member	GO Biological Processes	GO:0048667	cell morphogenesis involved in neuron differentiation	-12.2488	-8.70716	885,1600,1889,1944,1996,3670,3800,3975,4131,4884,5063,5530,5864,6585,6812,7345,9638,10381,22911,23237,23542,25861,26999,55558,56896,65059,133418	CCK,DAB1,ECE1,EFNA3,ELAVL4,ISL1,KIF5C,LHX1,MAP1B,NPTX1,PAK3,PPP3CA,RAB3A,SLIT1,STXBP1,UCHL1,FEZ1,TUBB3,WDR47,ARC,MAPK8IP2,WHRN,CYFIP2,PLXNA3,DPYSL5,RAPH1,EMB	27/423
1_Member	GO Biological Processes	GO:0032990	cell part morphogenesis	-12.2106	-8.70716	885,1600,1889,1944,1996,3670,3800,3975,4131,4884,5063,5530,5864,6585,6812,7345,9638,10381,22911,23237,23542,23769,26999,29993,51347,55558,56896,65059,133418	CCK,DAB1,ECE1,EFNA3,ELAVL4,ISL1,KIF5C,LHX1,MAP1B,NPTX1,PAK3,PPP3CA,RAB3A,SLIT1,STXBP1,UCHL1,FEZ1,TUBB3,WDR47,ARC,MAPK8IP2,FLRT1,CYFIP2,PACSIN1,TAOK3,PLXNA3,DPYSL5,RAPH1,EMB	29/494
1_Member	GO Biological Processes	GO:0000904	cell morphogenesis involved in differentiation	-11.4622	-8.01674	885,1600,1889,1944,1996,2195,3670,3800,3975,4131,4884,5063,5530,5864,6585,6812,7345,9638,10381,22911,23237,23542,25861,26999,55558,56896,65059,133418	CCK,DAB1,ECE1,EFNA3,ELAVL4,FAT1,ISL1,KIF5C,LHX1,MAP1B,NPTX1,PAK3,PPP3CA,RAB3A,SLIT1,STXBP1,UCHL1,FEZ1,TUBB3,WDR47,ARC,MAPK8IP2,WHRN,CYFIP2,PLXNA3,DPYSL5,RAPH1,EMB	28/493
1_Member	GO Biological Processes	GO:0061564	axon development	-10.9927	-7.59834	885,1600,1889,1944,3670,3725,3800,3975,4131,4760,4761,4884,5063,5864,6585,6812,7345,9638,10381,22911,26999,55558,56896,65059,133418	CCK,DAB1,ECE1,EFNA3,ISL1,JUN,KIF5C,LHX1,MAP1B,NEUROD1,NEUROD2,NPTX1,PAK3,RAB3A,SLIT1,STXBP1,UCHL1,FEZ1,TUBB3,WDR47,CYFIP2,PLXNA3,DPYSL5,RAPH1,EMB	25/408
1_Member	GO Biological Processes	GO:0032989	cellular component morphogenesis	-10.9147	-7.56614	885,1600,1889,1944,1996,2314,3670,3800,3975,4131,4884,5063,5530,5864,6585,6812,7345,9638,10381,22911,23237,23542,23769,26999,29993,51347,55558,56896,65059,133418	CCK,DAB1,ECE1,EFNA3,ELAVL4,FLII,ISL1,KIF5C,LHX1,MAP1B,NPTX1,PAK3,PPP3CA,RAB3A,SLIT1,STXBP1,UCHL1,FEZ1,TUBB3,WDR47,ARC,MAPK8IP2,FLRT1,CYFIP2,PACSIN1,TAOK3,PLXNA3,DPYSL5,RAPH1,EMB	30/597
1_Member	GO Biological Processes	GO:0007409	axonogenesis	-9.90107	-6.66645	885,1600,1889,1944,3670,3800,3975,4131,4884,5063,5864,6585,6812,7345,9638,10381,22911,26999,55558,56896,65059,133418	CCK,DAB1,ECE1,EFNA3,ISL1,KIF5C,LHX1,MAP1B,NPTX1,PAK3,RAB3A,SLIT1,STXBP1,UCHL1,FEZ1,TUBB3,WDR47,CYFIP2,PLXNA3,DPYSL5,RAPH1,EMB	22/352
1_Member	GO Biological Processes	GO:0007411	axon guidance	-5.03854	-2.40598	1889,1944,3670,3800,3975,6585,9638,10381,26999,55558,56896,133418	ECE1,EFNA3,ISL1,KIF5C,LHX1,SLIT1,FEZ1,TUBB3,CYFIP2,PLXNA3,DPYSL5,EMB	12/221
1_Member	GO Biological Processes	GO:0097485	neuron projection guidance	-5.03854	-2.40598	1889,1944,3670,3800,3975,6585,9638,10381,26999,55558,56896,133418	ECE1,EFNA3,ISL1,KIF5C,LHX1,SLIT1,FEZ1,TUBB3,CYFIP2,PLXNA3,DPYSL5,EMB	12/221
1_Member	GO Biological Processes	GO:0040011	locomotion	-3.88651	-1.5967	1113,1889,1944,2905,3570,3670,3800,3815,3975,5228,6585,9638,10381,26999,55558,56896,133418	CHGA,ECE1,EFNA3,GRIN2C,IL6R,ISL1,KIF5C,KIT,LHX1,PGF,SLIT1,FEZ1,TUBB3,CYFIP2,PLXNA3,DPYSL5,EMB	17/530
1_Member	GO Biological Processes	GO:0006935	chemotaxis	-3.58359	-1.42318	1113,1889,1944,3570,3670,3800,3815,3975,5228,6585,9638,10381,26999,55558,56896,133418	CHGA,ECE1,EFNA3,IL6R,ISL1,KIF5C,KIT,LHX1,PGF,SLIT1,FEZ1,TUBB3,CYFIP2,PLXNA3,DPYSL5,EMB	16/510
1_Member	GO Biological Processes	GO:0042330	taxis	-3.56477	-1.41761	1113,1889,1944,3570,3670,3800,3815,3975,5228,6585,9638,10381,26999,55558,56896,133418	CHGA,ECE1,EFNA3,IL6R,ISL1,KIF5C,KIT,LHX1,PGF,SLIT1,FEZ1,TUBB3,CYFIP2,PLXNA3,DPYSL5,EMB	16/512
2_Summary	GO Biological Processes	GO:0050804	modulation of chemical synaptic transmission	-10.7494	-7.45989	773,1759,1760,2550,2905,3815,4131,4204,4761,4884,5530,5575,5621,5864,6812,6855,8878,8938,9001,23025,23208,23237,23542,56853,57231,84502,347733,1996,7832,10347,8811,885,1600,2908,6774,7345,22911,85446,84918	CACNA1A,DNM1,DMPK,GABBR1,GRIN2C,KIT,MAP1B,MECP2,NEUROD2,NPTX1,PPP3CA,PRKAR1B,PRNP,RAB3A,STXBP1,SYP,SQSTM1,BAIAP3,HAP1,UNC13A,SYT11,ARC,MAPK8IP2,CELF4,SNX14,JPH4,TUBB2B,ELAVL4,BTG2,ABCA7,GALR2,CCK,DAB1,NR3C1,STAT3,UCHL1,WDR47,ZFHX2,LRP11	39/-
2_Member	GO Biological Processes	GO:0050804	modulation of chemical synaptic transmission	-10.7494	-7.45989	773,1759,1760,2550,2905,3815,4131,4204,4761,4884,5530,5575,5621,5864,6812,6855,8878,8938,9001,23025,23208,23237,23542,56853,57231,84502,347733	CACNA1A,DNM1,DMPK,GABBR1,GRIN2C,KIT,MAP1B,MECP2,NEUROD2,NPTX1,PPP3CA,PRKAR1B,PRNP,RAB3A,STXBP1,SYP,SQSTM1,BAIAP3,HAP1,UNC13A,SYT11,ARC,MAPK8IP2,CELF4,SNX14,JPH4,TUBB2B	27/491
2_Member	GO Biological Processes	GO:0099177	regulation of trans-synaptic signaling	-10.7293	-7.45989	773,1759,1760,2550,2905,3815,4131,4204,4761,4884,5530,5575,5621,5864,6812,6855,8878,8938,9001,23025,23208,23237,23542,56853,57231,84502,347733	CACNA1A,DNM1,DMPK,GABBR1,GRIN2C,KIT,MAP1B,MECP2,NEUROD2,NPTX1,PPP3CA,PRKAR1B,PRNP,RAB3A,STXBP1,SYP,SQSTM1,BAIAP3,HAP1,UNC13A,SYT11,ARC,MAPK8IP2,CELF4,SNX14,JPH4,TUBB2B	27/492
2_Member	GO Biological Processes	GO:0048167	regulation of synaptic plasticity	-6.0419	-3.1847	2905,3815,4131,4204,4761,5575,5621,5864,6812,6855,8878,23237,84502	GRIN2C,KIT,MAP1B,MECP2,NEUROD2,PRKAR1B,PRNP,RAB3A,STXBP1,SYP,SQSTM1,ARC,JPH4	13/210
2_Member	GO Biological Processes	GO:0007612	learning	-4.98688	-2.38651	1996,3815,4204,4761,7832,10347,23208,23237,23542,84502	ELAVL4,KIT,MECP2,NEUROD2,BTG2,ABCA7,SYT11,ARC,MAPK8IP2,JPH4	10/153
2_Member	GO Biological Processes	GO:0007611	learning or memory	-4.73153	-2.20252	1996,3815,4204,4761,5575,5621,7832,8811,10347,23208,23237,23542,84502	ELAVL4,KIT,MECP2,NEUROD2,PRKAR1B,PRNP,BTG2,GALR2,ABCA7,SYT11,ARC,MAPK8IP2,JPH4	13/277
2_Member	GO Biological Processes	GO:0007610	behavior	-4.59717	-2.08112	885,1600,1996,2908,3815,4204,4761,5575,5621,6774,7345,7832,8811,10347,22911,23208,23237,23542,84502,85446	CCK,DAB1,ELAVL4,NR3C1,KIT,MECP2,NEUROD2,PRKAR1B,PRNP,STAT3,UCHL1,BTG2,GALR2,ABCA7,WDR47,SYT11,ARC,MAPK8IP2,JPH4,ZFHX2	20/611
2_Member	GO Biological Processes	GO:0050890	cognition	-4.11514	-1.73133	1996,3815,4204,4761,5575,5621,7832,8811,10347,23208,23237,23542,84502	ELAVL4,KIT,MECP2,NEUROD2,PRKAR1B,PRNP,BTG2,GALR2,ABCA7,SYT11,ARC,MAPK8IP2,JPH4	13/318
2_Member	GO Biological Processes	GO:0008306	associative learning	-3.32953	-1.27544	1996,3815,4204,4761,7832,10347	ELAVL4,KIT,MECP2,NEUROD2,BTG2,ABCA7	6/87
2_Member	GO Biological Processes	GO:0033555	multicellular organismal response to stress	-2.61875	-0.842918	4204,4761,5530,23542,84918	MECP2,NEUROD2,PPP3CA,MAPK8IP2,LRP11	5/82
2_Member	GO Biological Processes	GO:0001662	behavioral fear response	-2.33338	-0.657846	4204,4761,23542	MECP2,NEUROD2,MAPK8IP2	3/30
2_Member	GO Biological Processes	GO:0002209	behavioral defense response	-2.29279	-0.635314	4204,4761,23542	MECP2,NEUROD2,MAPK8IP2	3/31
2_Member	GO Biological Processes	GO:0042596	fear response	-2.14404	-0.543667	4204,4761,23542	MECP2,NEUROD2,MAPK8IP2	3/35
3_Summary	GO Biological Processes	GO:0010817	regulation of hormone levels	-7.90489	-4.70246	1056,1113,1363,1889,2550,2696,2908,3670,4760,5122,5126,5530,5799,5864,5959,6690,8447,8938,51635,55512,65985,79751,140606,619373,1263,2810,3208,4345,5295,5621,9515,51465,258010,6812,85477,8878,10347,10979,23208	CEL,CHGA,CPE,ECE1,GABBR1,GIPR,NR3C1,ISL1,NEUROD1,PCSK1,PCSK2,PPP3CA,PTPRN2,RAB3A,RDH5,SPINK1,DOC2B,BAIAP3,DHRS7,SMPD3,AACS,SLC25A22,SELENOM,MBOAT4,PLK3,SFN,HPCA,CD200,PIK3R1,PRNP,STXBP5L,UBE2J1,SVIP,STXBP1,SCIN,SQSTM1,ABCA7,FERMT2,SYT11	39/-
3_Member	GO Biological Processes	GO:0010817	regulation of hormone levels	-7.90489	-4.70246	1056,1113,1363,1889,2550,2696,2908,3670,4760,5122,5126,5530,5799,5864,5959,6690,8447,8938,51635,55512,65985,79751,140606,619373	CEL,CHGA,CPE,ECE1,GABBR1,GIPR,NR3C1,ISL1,NEUROD1,PCSK1,PCSK2,PPP3CA,PTPRN2,RAB3A,RDH5,SPINK1,DOC2B,BAIAP3,DHRS7,SMPD3,AACS,SLC25A22,SELENOM,MBOAT4	24/533
3_Member	GO Biological Processes	GO:0051223	regulation of protein transport	-5.06229	-2.4127	1113,1263,2696,2810,3208,3670,4345,4760,5122,5295,5530,5621,8447,8938,9515,51465,65985,79751,258010	CHGA,PLK3,GIPR,SFN,HPCA,ISL1,CD200,NEUROD1,PCSK1,PIK3R1,PPP3CA,PRNP,DOC2B,BAIAP3,STXBP5L,UBE2J1,AACS,SLC25A22,SVIP	19/519
3_Member	GO Biological Processes	GO:0090276	regulation of peptide hormone secretion	-4.88361	-2.30591	1113,2550,2696,3670,4760,5530,6690,8447,8938,65985,79751	CHGA,GABBR1,GIPR,ISL1,NEUROD1,PPP3CA,SPINK1,DOC2B,BAIAP3,AACS,SLC25A22	11/192
3_Member	GO Biological Processes	GO:0002791	regulation of peptide secretion	-4.82058	-2.26441	1113,2550,2696,3670,4760,5530,6690,8447,8938,65985,79751	CHGA,GABBR1,GIPR,ISL1,NEUROD1,PPP3CA,SPINK1,DOC2B,BAIAP3,AACS,SLC25A22	11/195
3_Member	GO Biological Processes	GO:0090087	regulation of peptide transport	-4.77922	-2.24235	1113,2550,2696,3670,4760,5530,6690,8447,8938,65985,79751	CHGA,GABBR1,GIPR,ISL1,NEUROD1,PPP3CA,SPINK1,DOC2B,BAIAP3,AACS,SLC25A22	11/197
3_Member	GO Biological Processes	GO:0070201	regulation of establishment of protein localization	-4.778	-2.24235	1113,1263,2696,2810,3208,3670,4345,4760,5122,5295,5530,5621,8447,8938,9515,51465,65985,79751,258010	CHGA,PLK3,GIPR,SFN,HPCA,ISL1,CD200,NEUROD1,PCSK1,PIK3R1,PPP3CA,PRNP,DOC2B,BAIAP3,STXBP5L,UBE2J1,AACS,SLC25A22,SVIP	19/544
3_Member	GO Biological Processes	GO:0051047	positive regulation of secretion	-4.1289	-1.73133	2550,2696,3670,5122,5530,5864,6690,6812,8447,8938,55512,65985,85477	GABBR1,GIPR,ISL1,PCSK1,PPP3CA,RAB3A,SPINK1,STXBP1,DOC2B,BAIAP3,SMPD3,AACS,SCIN	13/317
3_Member	GO Biological Processes	GO:0050708	regulation of protein secretion	-4.10814	-1.73133	1113,2696,3670,4345,4760,5122,5530,8447,8938,9515,65985,79751	CHGA,GIPR,ISL1,CD200,NEUROD1,PCSK1,PPP3CA,DOC2B,BAIAP3,STXBP5L,AACS,SLC25A22	12/275
3_Member	GO Biological Processes	GO:0050796	regulation of insulin secretion	-3.97496	-1.64344	1113,2696,3670,4760,5530,8447,8938,65985,79751	CHGA,GIPR,ISL1,NEUROD1,PPP3CA,DOC2B,BAIAP3,AACS,SLC25A22	9/163
3_Member	GO Biological Processes	GO:0046883	regulation of hormone secretion	-3.88991	-1.5967	1113,2550,2696,3670,4760,5530,6690,8447,8938,65985,79751	CHGA,GABBR1,GIPR,ISL1,NEUROD1,PPP3CA,SPINK1,DOC2B,BAIAP3,AACS,SLC25A22	11/247
3_Member	GO Biological Processes	GO:0090277	positive regulation of peptide hormone secretion	-3.6568	-1.46836	2550,2696,3670,6690,8447,8938,65985	GABBR1,GIPR,ISL1,SPINK1,DOC2B,BAIAP3,AACS	7/107
3_Member	GO Biological Processes	GO:0002793	positive regulation of peptide secretion	-3.60721	-1.4405	2550,2696,3670,6690,8447,8938,65985	GABBR1,GIPR,ISL1,SPINK1,DOC2B,BAIAP3,AACS	7/109
3_Member	GO Biological Processes	GO:1903829	positive regulation of protein localization	-3.47205	-1.36404	1263,2696,2810,3208,3670,5122,5295,5621,8447,8878,8938,10347,10979,23208,65985	PLK3,GIPR,SFN,HPCA,ISL1,PCSK1,PIK3R1,PRNP,DOC2B,SQSTM1,BAIAP3,ABCA7,FERMT2,SYT11,AACS	15/470
3_Member	GO Biological Processes	GO:1903532	positive regulation of secretion by cell	-3.3066	-1.26189	2550,2696,3670,5122,5864,6690,6812,8447,8938,55512,65985	GABBR1,GIPR,ISL1,PCSK1,RAB3A,SPINK1,STXBP1,DOC2B,BAIAP3,SMPD3,AACS	11/289
3_Member	GO Biological Processes	GO:0051222	positive regulation of protein transport	-3.05621	-1.11589	1263,2696,2810,3208,3670,5122,5295,5621,8447,8938,65985	PLK3,GIPR,SFN,HPCA,ISL1,PCSK1,PIK3R1,PRNP,DOC2B,BAIAP3,AACS	11/310
3_Member	GO Biological Processes	GO:0046887	positive regulation of hormone secretion	-2.99245	-1.07846	2550,2696,3670,6690,8447,8938,65985	GABBR1,GIPR,ISL1,SPINK1,DOC2B,BAIAP3,AACS	7/138
3_Member	GO Biological Processes	GO:1904951	positive regulation of establishment of protein localization	-2.88073	-1.00929	1263,2696,2810,3208,3670,5122,5295,5621,8447,8938,65985	PLK3,GIPR,SFN,HPCA,ISL1,PCSK1,PIK3R1,PRNP,DOC2B,BAIAP3,AACS	11/326
3_Member	GO Biological Processes	GO:0032024	positive regulation of insulin secretion	-2.59573	-0.834569	2696,3670,8447,8938,65985	GIPR,ISL1,DOC2B,BAIAP3,AACS	5/83
3_Member	GO Biological Processes	GO:0050714	positive regulation of protein secretion	-2.18916	-0.568143	2696,3670,5122,8447,8938,65985	GIPR,ISL1,PCSK1,DOC2B,BAIAP3,AACS	6/146
4_Summary	GO Biological Processes	GO:0051129	negative regulation of cellular component organization	-7.73938	-4.56691	1600,2314,3670,4000,4131,4761,5295,5530,5621,6585,6812,9026,9181,9638,10347,10459,22911,23208,26471,29993,51571,55466,55558,56896,58526,64422,85477,258010,4204,5063,10979,22924,26999,225689,9001	DAB1,FLII,ISL1,LMNA,MAP1B,NEUROD2,PIK3R1,PPP3CA,PRNP,SLIT1,STXBP1,HIP1R,ARHGEF2,FEZ1,ABCA7,MAD2L2,WDR47,SYT11,NUPR1,PACSIN1,CYRIB,DNAJA4,PLXNA3,DPYSL5,MID1IP1,ATG3,SCIN,SVIP,MECP2,PAK3,FERMT2,MAPRE3,CYFIP2,MAPK15,HAP1	35/-
4_Member	GO Biological Processes	GO:0051129	negative regulation of cellular component organization	-7.73938	-4.56691	1600,2314,3670,4000,4131,4761,5295,5530,5621,6585,6812,9026,9181,9638,10347,10459,22911,23208,26471,29993,51571,55466,55558,56896,58526,64422,85477,258010	DAB1,FLII,ISL1,LMNA,MAP1B,NEUROD2,PIK3R1,PPP3CA,PRNP,SLIT1,STXBP1,HIP1R,ARHGEF2,FEZ1,ABCA7,MAD2L2,WDR47,SYT11,NUPR1,PACSIN1,CYRIB,DNAJA4,PLXNA3,DPYSL5,MID1IP1,ATG3,SCIN,SVIP	28/721
4_Member	GO Biological Processes	GO:0051494	negative regulation of cytoskeleton organization	-4.0575	-1.69298	2314,4131,5295,9026,9181,22911,51571,58526,85477	FLII,MAP1B,PIK3R1,HIP1R,ARHGEF2,WDR47,CYRIB,MID1IP1,SCIN	9/159
4_Member	GO Biological Processes	GO:1901880	negative regulation of protein depolymerization	-4.02558	-1.67702	2314,4131,9181,22911,58526,85477	FLII,MAP1B,ARHGEF2,WDR47,MID1IP1,SCIN	6/65
4_Member	GO Biological Processes	GO:1902904	negative regulation of supramolecular fiber organization	-3.97496	-1.64344	2314,4131,5295,9026,9181,22911,51571,58526,85477	FLII,MAP1B,PIK3R1,HIP1R,ARHGEF2,WDR47,CYRIB,MID1IP1,SCIN	9/163
4_Member	GO Biological Processes	GO:1902903	regulation of supramolecular fiber organization	-3.88448	-1.5967	2314,4131,4204,5063,5295,9026,9181,10979,22911,22924,26999,51571,58526,85477	FLII,MAP1B,MECP2,PAK3,PIK3R1,HIP1R,ARHGEF2,FERMT2,WDR47,MAPRE3,CYFIP2,CYRIB,MID1IP1,SCIN	14/382
4_Member	GO Biological Processes	GO:0010639	negative regulation of organelle organization	-3.81386	-1.56221	2314,4000,4131,5295,9026,9181,9638,10459,22911,26471,51571,58526,85477	FLII,LMNA,MAP1B,PIK3R1,HIP1R,ARHGEF2,FEZ1,MAD2L2,WDR47,NUPR1,CYRIB,MID1IP1,SCIN	13/341
4_Member	GO Biological Processes	GO:0007026	negative regulation of microtubule depolymerization	-3.70487	-1.49923	4131,9181,22911,58526	MAP1B,ARHGEF2,WDR47,MID1IP1	4/26
4_Member	GO Biological Processes	GO:0043242	negative regulation of protein-containing complex disassembly	-3.67966	-1.48339	2314,4131,9181,22911,58526,85477	FLII,MAP1B,ARHGEF2,WDR47,MID1IP1,SCIN	6/75
4_Member	GO Biological Processes	GO:0051493	regulation of cytoskeleton organization	-3.49975	-1.37391	2314,4131,4204,5063,5295,9026,9181,10979,22911,22924,26999,51571,55558,58526,85477,225689	FLII,MAP1B,MECP2,PAK3,PIK3R1,HIP1R,ARHGEF2,FERMT2,WDR47,MAPRE3,CYFIP2,CYRIB,PLXNA3,MID1IP1,SCIN,MAPK15	16/519
4_Member	GO Biological Processes	GO:0031114	regulation of microtubule depolymerization	-3.45715	-1.35657	4131,9181,22911,58526	MAP1B,ARHGEF2,WDR47,MID1IP1	4/30
4_Member	GO Biological Processes	GO:1901879	regulation of protein depolymerization	-3.35647	-1.29347	2314,4131,9181,22911,58526,85477	FLII,MAP1B,ARHGEF2,WDR47,MID1IP1,SCIN	6/86
4_Member	GO Biological Processes	GO:0031110	regulation of microtubule polymerization or depolymerization	-3.30296	-1.26189	4131,4204,9181,22911,22924,58526	MAP1B,MECP2,ARHGEF2,WDR47,MAPRE3,MID1IP1	6/88
4_Member	GO Biological Processes	GO:0031111	negative regulation of microtubule polymerization or depolymerization	-3.01457	-1.08969	4131,9181,22911,58526	MAP1B,ARHGEF2,WDR47,MID1IP1	4/39
4_Member	GO Biological Processes	GO:0070507	regulation of microtubule cytoskeleton organization	-2.70225	-0.896516	4131,4204,9181,22911,22924,58526,225689	MAP1B,MECP2,ARHGEF2,WDR47,MAPRE3,MID1IP1,MAPK15	7/155
4_Member	GO Biological Processes	GO:0032886	regulation of microtubule-based process	-2.60383	-0.837753	4131,4204,9001,9181,9638,22911,22924,58526,225689	MAP1B,MECP2,HAP1,ARHGEF2,FEZ1,WDR47,MAPRE3,MID1IP1,MAPK15	9/253
4_Member	GO Biological Processes	GO:0043244	regulation of protein-containing complex disassembly	-2.55127	-0.79873	2314,4131,9181,22911,58526,85477	FLII,MAP1B,ARHGEF2,WDR47,MID1IP1,SCIN	6/123
5_Summary	GO Biological Processes	GO:0051046	regulation of secretion	-7.11687	-3.97243	1113,2550,2696,3670,4345,4760,4905,5122,5530,5799,5864,6690,6812,6855,8447,8938,9001,9026,9515,10079,23208,55512,65985,79751,85477,1363,3815,4204,23025,23233,140606,222962,1056,2030,773,1759,1644,3382,3208,5575,10347,23237,29993,64422,1212,2038,4131,26470,84966,116151	CHGA,GABBR1,GIPR,ISL1,CD200,NEUROD1,NSF,PCSK1,PPP3CA,PTPRN2,RAB3A,SPINK1,STXBP1,SYP,DOC2B,BAIAP3,HAP1,HIP1R,STXBP5L,ATP9A,SYT11,SMPD3,AACS,SLC25A22,SCIN,CPE,KIT,MECP2,UNC13A,EXOC6B,SELENOM,SLC29A4,CEL,SLC29A1,CACNA1A,DNM1,DDC,ICA1,HPCA,PRKAR1B,ABCA7,ARC,PACSIN1,ATG3,CLTB,EPB42,MAP1B,SEZ6L2,IGSF21,FAM210B	50/-
5_Member	GO Biological Processes	GO:0051046	regulation of secretion	-7.11687	-3.97243	1113,2550,2696,3670,4345,4760,4905,5122,5530,5799,5864,6690,6812,6855,8447,8938,9001,9026,9515,10079,23208,55512,65985,79751,85477	CHGA,GABBR1,GIPR,ISL1,CD200,NEUROD1,NSF,PCSK1,PPP3CA,PTPRN2,RAB3A,SPINK1,STXBP1,SYP,DOC2B,BAIAP3,HAP1,HIP1R,STXBP5L,ATP9A,SYT11,SMPD3,AACS,SLC25A22,SCIN	25/632
5_Member	GO Biological Processes	GO:0032940	secretion by cell	-6.56391	-3.47062	1113,1363,3815,4204,4760,4905,5799,5864,6812,8447,8938,9001,9515,23025,23208,23233,55512,85477,140606	CHGA,CPE,KIT,MECP2,NEUROD1,NSF,PTPRN2,RAB3A,STXBP1,DOC2B,BAIAP3,HAP1,STXBP5L,UNC13A,SYT11,EXOC6B,SMPD3,SCIN,SELENOM	19/410
5_Member	GO Biological Processes	GO:0140352	export from cell	-6.26402	-3.29568	1113,1363,3815,4204,4760,4905,5799,5864,6812,8447,8938,9001,9515,23025,23208,23233,55512,85477,140606,222962	CHGA,CPE,KIT,MECP2,NEUROD1,NSF,PTPRN2,RAB3A,STXBP1,DOC2B,BAIAP3,HAP1,STXBP5L,UNC13A,SYT11,EXOC6B,SMPD3,SCIN,SELENOM,SLC29A4	20/472
5_Member	GO Biological Processes	GO:0046903	secretion	-6.12995	-3.23715	1056,1113,1363,2030,3815,4204,4760,4905,5799,5864,6812,8447,8938,9001,9515,23025,23208,23233,55512,85477,140606	CEL,CHGA,CPE,SLC29A1,KIT,MECP2,NEUROD1,NSF,PTPRN2,RAB3A,STXBP1,DOC2B,BAIAP3,HAP1,STXBP5L,UNC13A,SYT11,EXOC6B,SMPD3,SCIN,SELENOM	21/526
5_Member	GO Biological Processes	GO:1903530	regulation of secretion by cell	-6.11227	-3.23715	1113,2550,2696,3670,4345,4760,4905,5122,5530,5864,6690,6812,6855,8447,8938,9001,9515,10079,23208,55512,65985,79751	CHGA,GABBR1,GIPR,ISL1,CD200,NEUROD1,NSF,PCSK1,PPP3CA,RAB3A,SPINK1,STXBP1,SYP,DOC2B,BAIAP3,HAP1,STXBP5L,ATP9A,SYT11,SMPD3,AACS,SLC25A22	22/573
5_Member	WikiPathways	WP2267	Synaptic vesicle pathway	-5.77484	-2.98259	773,1759,4905,5864,6812,6855,23025	CACNA1A,DNM1,NSF,RAB3A,STXBP1,SYP,UNC13A	7/51
5_Member	GO Biological Processes	GO:0006887	exocytosis	-5.49862	-2.75213	1113,3815,4905,5864,6812,8447,8938,9001,9515,23025,23208,23233,85477	CHGA,KIT,NSF,RAB3A,STXBP1,DOC2B,BAIAP3,HAP1,STXBP5L,UNC13A,SYT11,EXOC6B,SCIN	13/235
5_Member	GO Biological Processes	GO:0006836	neurotransmitter transport	-5.35663	-2.63132	1644,2030,3382,5799,5864,6812,8447,23025,23208,222962	DDC,SLC29A1,ICA1,PTPRN2,RAB3A,STXBP1,DOC2B,UNC13A,SYT11,SLC29A4	10/139
5_Member	GO Biological Processes	GO:0060627	regulation of vesicle-mediated transport	-4.92347	-2.33834	3208,4905,5530,5575,5864,6812,6855,8447,8938,9001,9026,9515,10079,10347,23208,23237,29993,55512,64422	HPCA,NSF,PPP3CA,PRKAR1B,RAB3A,STXBP1,SYP,DOC2B,BAIAP3,HAP1,HIP1R,STXBP5L,ATP9A,ABCA7,SYT11,ARC,PACSIN1,SMPD3,ATG3	19/531
5_Member	GO Biological Processes	GO:0017157	regulation of exocytosis	-4.84146	-2.27105	4905,5864,6812,6855,8447,8938,9001,9515,10079,23208,55512	NSF,RAB3A,STXBP1,SYP,DOC2B,BAIAP3,HAP1,STXBP5L,ATP9A,SYT11,SMPD3	11/194
5_Member	GO Biological Processes	GO:0017156	calcium-ion regulated exocytosis	-4.78364	-2.24235	5864,6812,8447,23025,23208,85477	RAB3A,STXBP1,DOC2B,UNC13A,SYT11,SCIN	6/48
5_Member	KEGG Pathway	hsa04721	Synaptic vesicle cycle	-4.52989	-2.03259	773,1212,1759,4905,5864,6812,23025	CACNA1A,CLTB,DNM1,NSF,RAB3A,STXBP1,UNC13A	7/78
5_Member	GO Biological Processes	GO:0048791	calcium ion-regulated exocytosis of neurotransmitter	-4.36278	-1.88378	6812,8447,23025,23208	STXBP1,DOC2B,UNC13A,SYT11	4/18
5_Member	GO Biological Processes	GO:0021700	developmental maturation	-4.1994	-1.76175	2038,4131,4204,5864,6690,6812,6855,8938,23025,26470,84966,116151	EPB42,MAP1B,MECP2,RAB3A,SPINK1,STXBP1,SYP,BAIAP3,UNC13A,SEZ6L2,IGSF21,FAM210B	12/269
5_Member	GO Biological Processes	GO:0017158	regulation of calcium ion-dependent exocytosis	-4.12265	-1.73133	5864,6812,8447,8938,23208	RAB3A,STXBP1,DOC2B,BAIAP3,SYT11	5/39
5_Member	GO Biological Processes	GO:0001505	regulation of neurotransmitter levels	-3.83807	-1.58294	2030,5799,5864,6812,6855,8447,8938,23025,23208,222962	SLC29A1,PTPRN2,RAB3A,STXBP1,SYP,DOC2B,BAIAP3,UNC13A,SYT11,SLC29A4	10/209
5_Member	GO Biological Processes	GO:0016188	synaptic vesicle maturation	-3.6391	-1.46373	5864,6812,6855,23025	RAB3A,STXBP1,SYP,UNC13A	4/27
5_Member	GO Biological Processes	GO:0045055	regulated exocytosis	-3.61159	-1.442	1113,3815,5864,6812,8447,23025,23208,85477	CHGA,KIT,RAB3A,STXBP1,DOC2B,UNC13A,SYT11,SCIN	8/144
5_Member	GO Biological Processes	GO:0031630	regulation of synaptic vesicle fusion to presynaptic active zone membrane	-3.53412	-1.39775	5864,6812,8447	RAB3A,STXBP1,DOC2B	3/12
5_Member	GO Biological Processes	GO:1901632	regulation of synaptic vesicle membrane organization	-3.53412	-1.39775	5864,6812,8447	RAB3A,STXBP1,DOC2B	3/12
5_Member	GO Biological Processes	GO:0007269	neurotransmitter secretion	-3.38379	-1.31398	5799,5864,6812,8447,23025,23208	PTPRN2,RAB3A,STXBP1,DOC2B,UNC13A,SYT11	6/85
5_Member	GO Biological Processes	GO:0099643	signal release from synapse	-3.38379	-1.31398	5799,5864,6812,8447,23025,23208	PTPRN2,RAB3A,STXBP1,DOC2B,UNC13A,SYT11	6/85
5_Member	GO Biological Processes	GO:0016079	synaptic vesicle exocytosis	-3.16406	-1.19208	5864,6812,8447,23025,23208	RAB3A,STXBP1,DOC2B,UNC13A,SYT11	5/62
5_Member	GO Biological Processes	GO:0006904	vesicle docking involved in exocytosis	-2.89231	-1.01797	5864,6812,23025,23233	RAB3A,STXBP1,UNC13A,EXOC6B	4/42
5_Member	GO Biological Processes	GO:0046928	regulation of neurotransmitter secretion	-2.61875	-0.842918	5864,6812,6855,8938,23208	RAB3A,STXBP1,SYP,BAIAP3,SYT11	5/82
5_Member	GO Biological Processes	GO:0031338	regulation of vesicle fusion	-2.61398	-0.842918	5864,6812,8447	RAB3A,STXBP1,DOC2B	3/24
5_Member	GO Biological Processes	GO:1903305	regulation of regulated secretory pathway	-2.43251	-0.721891	5864,6812,6855,8447,8938,23208	RAB3A,STXBP1,SYP,DOC2B,BAIAP3,SYT11	6/130
5_Member	GO Biological Processes	GO:0051588	regulation of neurotransmitter transport	-2.26757	-0.61624	5864,6812,6855,8938,23208	RAB3A,STXBP1,SYP,BAIAP3,SYT11	5/99
5_Member	GO Biological Processes	GO:0048278	vesicle docking	-2.24672	-0.605735	5864,6812,23025,23233	RAB3A,STXBP1,UNC13A,EXOC6B	4/63
5_Member	GO Biological Processes	GO:0140029	exocytic process	-2.10783	-0.516664	5864,6812,23025,23233	RAB3A,STXBP1,UNC13A,EXOC6B	4/69
6_Summary	KEGG Pathway	hsa04972	Pancreatic secretion	-6.59457	-3.47647	489,885,1056,1358,1504,3778,5407,5644,5645,23436,1298,206358,710,5274,5276,8722,55959	ATP2A3,CCK,CEL,CPA2,CTRB1,KCNMA1,PNLIPRP1,PRSS1,PRSS2,CELA3B,COL9A2,SLC36A1,SERPING1,SERPINI1,SERPINI2,CTSF,SULF2	17/-
6_Member	KEGG Pathway	hsa04972	Pancreatic secretion	-6.59457	-3.47647	489,885,1056,1358,1504,3778,5407,5644,5645,23436	ATP2A3,CCK,CEL,CPA2,CTRB1,KCNMA1,PNLIPRP1,PRSS1,PRSS2,CELA3B	10/102
6_Member	KEGG Pathway	hsa04974	Protein digestion and absorption	-3.75939	-1.53342	1298,1358,1504,5644,5645,23436,206358	COL9A2,CPA2,CTRB1,PRSS1,PRSS2,CELA3B,SLC36A1	7/103
6_Member	Canonical Pathways	M3468	NABA ECM REGULATORS	-2.22578	-0.592385	710,5274,5276,5644,5645,8722,23436,55959	SERPING1,SERPINI1,SERPINI2,PRSS1,PRSS2,CTSF,CELA3B,SULF2	8/238
6_Member	Reactome Gene Sets	R-HSA-1592389	Activation of Matrix Metalloproteinases	-2.21586	-0.587465	1504,5644,5645	CTRB1,PRSS1,PRSS2	3/33
6_Member	GO Biological Processes	GO:0007586	digestion	-2.04567	-0.476712	885,1056,1504,5644,5645	CCK,CEL,CTRB1,PRSS1,PRSS2	5/112
7_Summary	GO Biological Processes	GO:0044057	regulation of system process	-6.49262	-3.42281	89,489,781,1113,1760,1889,2309,2905,3670,3815,4000,4204,4760,4884,5530,5575,6690,9026,9312,10162,10659,56853,85446,323,3778,8811,55959	ACTN3,ATP2A3,CACNA2D1,CHGA,DMPK,ECE1,FOXO3,GRIN2C,ISL1,KIT,LMNA,MECP2,NEUROD1,NPTX1,PPP3CA,PRKAR1B,SPINK1,HIP1R,KCNB2,LPCAT3,CELF2,CELF4,ZFHX2,APBB2,KCNMA1,GALR2,SULF2	27/-
7_Member	GO Biological Processes	GO:0044057	regulation of system process	-6.49262	-3.42281	89,489,781,1113,1760,1889,2309,2905,3670,3815,4000,4204,4760,4884,5530,5575,6690,9026,9312,10162,10659,56853,85446	ACTN3,ATP2A3,CACNA2D1,CHGA,DMPK,ECE1,FOXO3,GRIN2C,ISL1,KIT,LMNA,MECP2,NEUROD1,NPTX1,PPP3CA,PRKAR1B,SPINK1,HIP1R,KCNB2,LPCAT3,CELF2,CELF4,ZFHX2	23/589
7_Member	GO Biological Processes	GO:0003012	muscle system process	-2.24688	-0.605735	89,323,781,1113,1760,3778,5530,8811,55959	ACTN3,APBB2,CACNA2D1,CHGA,DMPK,KCNMA1,PPP3CA,GALR2,SULF2	9/287
7_Member	GO Biological Processes	GO:0090257	regulation of muscle system process	-2.07273	-0.491323	89,1113,1760,2309,3815,4000,5530,9312	ACTN3,CHGA,DMPK,FOXO3,KIT,LMNA,PPP3CA,KCNB2	8/253
8_Summary	GO Biological Processes	GO:0045664	regulation of neuron differentiation	-6.35676	-3.34354	1600,1944,3670,4131,4610,4760,4761,5087,7732,9181,54845,85446,221938,5295	DAB1,EFNA3,ISL1,MAP1B,MYCL,NEUROD1,NEUROD2,PBX1,RNF112,ARHGEF2,ESRP1,ZFHX2,MMD2,PIK3R1	14/-
8_Member	GO Biological Processes	GO:0045664	regulation of neuron differentiation	-6.35676	-3.34354	1600,1944,3670,4131,4610,4760,4761,5087,7732,9181,54845,85446,221938	DAB1,EFNA3,ISL1,MAP1B,MYCL,NEUROD1,NEUROD2,PBX1,RNF112,ARHGEF2,ESRP1,ZFHX2,MMD2	13/197
8_Member	GO Biological Processes	GO:0045666	positive regulation of neuron differentiation	-4.00864	-1.66868	1600,4131,4760,4761,7732,9181,221938	DAB1,MAP1B,NEUROD1,NEUROD2,RNF112,ARHGEF2,MMD2	7/94
8_Member	Canonical Pathways	M69	PID REELIN PATHWAY	-3.57602	-1.42318	1600,4131,5295,9181	DAB1,MAP1B,PIK3R1,ARHGEF2	4/28
9_Summary	GO Biological Processes	GO:0010256	endomembrane system organization	-6.35633	-3.34354	1263,1759,1760,4000,4905,5205,5864,6855,7732,7905,8878,8938,9382,10162,10347,10783,23208,29993,64400,79137,79720,225689,1644,6812,8120,8447,23025,50618,9026,10079,23233,80765,114879,547,1212,2810,10381,79958,147700,347733,6345,23237,92737	PLK3,DNM1,DMPK,LMNA,NSF,ATP8B1,RAB3A,SYP,RNF112,REEP5,SQSTM1,BAIAP3,COG1,LPCAT3,ABCA7,NEK6,SYT11,PACSIN1,AKTIP,RETREG2,VPS37B,MAPK15,DDC,STXBP1,AP3B2,DOC2B,UNC13A,ITSN2,HIP1R,ATP9A,EXOC6B,STARD5,OSBPL5,KIF1A,CLTB,SFN,TUBB3,DENND1C,KLC3,TUBB2B,SRL,ARC,DNER	43/-
9_Member	GO Biological Processes	GO:0010256	endomembrane system organization	-6.35633	-3.34354	1263,1759,1760,4000,4905,5205,5864,6855,7732,7905,8878,8938,9382,10162,10347,10783,23208,29993,64400,79137,79720,225689	PLK3,DNM1,DMPK,LMNA,NSF,ATP8B1,RAB3A,SYP,RNF112,REEP5,SQSTM1,BAIAP3,COG1,LPCAT3,ABCA7,NEK6,SYT11,PACSIN1,AKTIP,RETREG2,VPS37B,MAPK15	22/554
9_Member	GO Biological Processes	GO:0099504	synaptic vesicle cycle	-6.18385	-3.25585	1644,1759,5864,6812,6855,8120,8447,23025,23208,29993,50618	DDC,DNM1,RAB3A,STXBP1,SYP,AP3B2,DOC2B,UNC13A,SYT11,PACSIN1,ITSN2	11/141
9_Member	GO Biological Processes	GO:0099003	vesicle-mediated transport in synapse	-5.88825	-3.07785	1644,1759,5864,6812,6855,8120,8447,23025,23208,29993,50618	DDC,DNM1,RAB3A,STXBP1,SYP,AP3B2,DOC2B,UNC13A,SYT11,PACSIN1,ITSN2	11/151
9_Member	GO Biological Processes	GO:0036465	synaptic vesicle recycling	-4.18161	-1.76175	1759,5864,6855,8120,29993,50618	DNM1,RAB3A,SYP,AP3B2,PACSIN1,ITSN2	6/61
9_Member	GO Biological Processes	GO:0061024	membrane organization	-3.76372	-1.53342	1759,1760,4000,4905,5205,5864,6812,6855,7905,8120,9026,10079,10162,10347,10783,23208,23233,29993,79720,80765,114879	DNM1,DMPK,LMNA,NSF,ATP8B1,RAB3A,STXBP1,SYP,REEP5,AP3B2,HIP1R,ATP9A,LPCAT3,ABCA7,NEK6,SYT11,EXOC6B,PACSIN1,VPS37B,STARD5,OSBPL5	21/759
9_Member	GO Biological Processes	GO:0048488	synaptic vesicle endocytosis	-3.48121	-1.36565	1759,6855,8120,29993,50618	DNM1,SYP,AP3B2,PACSIN1,ITSN2	5/53
9_Member	GO Biological Processes	GO:0140238	presynaptic endocytosis	-3.40562	-1.32658	1759,6855,8120,29993,50618	DNM1,SYP,AP3B2,PACSIN1,ITSN2	5/55
9_Member	GO Biological Processes	GO:0016050	vesicle organization	-2.74689	-0.913467	1759,5864,6812,6855,8120,8878,8938,23025,23208,64400,79720	DNM1,RAB3A,STXBP1,SYP,AP3B2,SQSTM1,BAIAP3,UNC13A,SYT11,AKTIP,VPS37B	11/339
9_Member	Reactome Gene Sets	R-HSA-199991	Membrane Trafficking	-2.5943	-0.834569	547,1212,1759,2810,4905,5864,9026,9382,10381,23208,29993,50618,79720,79958,147700,347733	KIF1A,CLTB,DNM1,SFN,NSF,RAB3A,HIP1R,COG1,TUBB3,SYT11,PACSIN1,ITSN2,VPS37B,DENND1C,KLC3,TUBB2B	16/634
9_Member	WikiPathways	WP5323	Fatty Acids and Lipoproteins Transport in Hepatocytes	-2.36094	-0.672295	1759,6345,6855,9026,10079,23237,29993,50618,79958,92737,114879	DNM1,SRL,SYP,HIP1R,ATP9A,ARC,PACSIN1,ITSN2,DENND1C,DNER,OSBPL5	11/381
9_Member	Reactome Gene Sets	R-HSA-5653656	Vesicle-mediated transport	-2.34493	-0.663828	547,1212,1759,2810,4905,5864,9026,9382,10381,23208,29993,50618,79720,79958,147700,347733	KIF1A,CLTB,DNM1,SFN,NSF,RAB3A,HIP1R,COG1,TUBB3,SYT11,PACSIN1,ITSN2,VPS37B,DENND1C,KLC3,TUBB2B	16/673
9_Member	Reactome Gene Sets	R-HSA-8856828	Clathrin-mediated endocytosis	-2.18916	-0.568143	1212,1759,9026,23208,29993,50618	CLTB,DNM1,HIP1R,SYT11,PACSIN1,ITSN2	6/146
10_Summary	GO Biological Processes	GO:0120035	regulation of plasma membrane bounded cell projection organization	-6.34967	-3.34354	547,1600,1996,3815,4131,5063,5205,5274,5295,5530,5621,6585,9001,9638,23237,23413,29993,49856,55558,56896,64422,126520,225689,347733,4204,23542,23769	KIF1A,DAB1,ELAVL4,KIT,MAP1B,PAK3,ATP8B1,SERPINI1,PIK3R1,PPP3CA,PRNP,SLIT1,HAP1,FEZ1,ARC,NCS1,PACSIN1,WRAP73,PLXNA3,DPYSL5,ATG3,PLK5,MAPK15,TUBB2B,MECP2,MAPK8IP2,FLRT1	27/-
10_Member	GO Biological Processes	GO:0120035	regulation of plasma membrane bounded cell projection organization	-6.34967	-3.34354	547,1600,1996,3815,4131,5063,5205,5274,5295,5530,5621,6585,9001,9638,23237,23413,29993,49856,55558,56896,64422,126520,225689,347733	KIF1A,DAB1,ELAVL4,KIT,MAP1B,PAK3,ATP8B1,SERPINI1,PIK3R1,PPP3CA,PRNP,SLIT1,HAP1,FEZ1,ARC,NCS1,PACSIN1,WRAP73,PLXNA3,DPYSL5,ATG3,PLK5,MAPK15,TUBB2B	24/647
10_Member	GO Biological Processes	GO:0031344	regulation of cell projection organization	-6.17305	-3.25585	547,1600,1996,3815,4131,5063,5205,5274,5295,5530,5621,6585,9001,9638,23237,23413,29993,49856,55558,56896,64422,126520,225689,347733	KIF1A,DAB1,ELAVL4,KIT,MAP1B,PAK3,ATP8B1,SERPINI1,PIK3R1,PPP3CA,PRNP,SLIT1,HAP1,FEZ1,ARC,NCS1,PACSIN1,WRAP73,PLXNA3,DPYSL5,ATG3,PLK5,MAPK15,TUBB2B	24/662
10_Member	GO Biological Processes	GO:0016358	dendrite development	-5.33355	-2.61846	1600,1996,4131,4204,5063,5530,23237,23542,23769	DAB1,ELAVL4,MAP1B,MECP2,PAK3,PPP3CA,ARC,MAPK8IP2,FLRT1	9/110
10_Member	GO Biological Processes	GO:0010975	regulation of neuron projection development	-4.18089	-1.76175	547,1600,1996,4131,5063,5274,5530,6585,9638,23237,23413,29993,55558,56896,126520,347733	KIF1A,DAB1,ELAVL4,MAP1B,PAK3,SERPINI1,PPP3CA,SLIT1,FEZ1,ARC,NCS1,PACSIN1,PLXNA3,DPYSL5,PLK5,TUBB2B	16/452
10_Member	GO Biological Processes	GO:0031346	positive regulation of cell projection organization	-3.6437	-1.46373	1996,3815,4131,5063,5274,5295,9001,9638,29993,49856,55558,126520,347733	ELAVL4,KIT,MAP1B,PAK3,SERPINI1,PIK3R1,HAP1,FEZ1,PACSIN1,WRAP73,PLXNA3,PLK5,TUBB2B	13/355
10_Member	GO Biological Processes	GO:0048813	dendrite morphogenesis	-3.16406	-1.19208	1996,5063,5530,23237,23542	ELAVL4,PAK3,PPP3CA,ARC,MAPK8IP2	5/62
10_Member	GO Biological Processes	GO:0010976	positive regulation of neuron projection development	-2.67078	-0.874886	1996,5063,5274,9638,29993,126520,347733	ELAVL4,PAK3,SERPINI1,FEZ1,PACSIN1,PLK5,TUBB2B	7/157
10_Member	GO Biological Processes	GO:0050773	regulation of dendrite development	-2.17814	-0.56453	1996,5063,5530,29993,56896	ELAVL4,PAK3,PPP3CA,PACSIN1,DPYSL5	5/104
11_Summary	GO Biological Processes	GO:0043269	regulation of monoatomic ion transport	-6.31565	-3.32882	773,781,1318,1760,2905,3208,3746,3748,3778,5205,5349,5530,5621,6690,8811,9001,9132,9312,23237,30818,54800,84502,131096,5295,23542	CACNA1A,CACNA2D1,SLC31A2,DMPK,GRIN2C,HPCA,KCNC1,KCNC3,KCNMA1,ATP8B1,FXYD3,PPP3CA,PRNP,SPINK1,GALR2,HAP1,KCNQ4,KCNB2,ARC,KCNIP3,KLHL24,JPH4,KCNH8,PIK3R1,MAPK8IP2	25/-
11_Member	GO Biological Processes	GO:0043269	regulation of monoatomic ion transport	-6.31565	-3.32882	773,781,1318,1760,2905,3208,3746,3748,3778,5205,5349,5530,5621,6690,8811,9001,9132,9312,23237,30818,54800,84502,131096	CACNA1A,CACNA2D1,SLC31A2,DMPK,GRIN2C,HPCA,KCNC1,KCNC3,KCNMA1,ATP8B1,FXYD3,PPP3CA,PRNP,SPINK1,GALR2,HAP1,KCNQ4,KCNB2,ARC,KCNIP3,KLHL24,JPH4,KCNH8	23/603
11_Member	GO Biological Processes	GO:0034765	regulation of monoatomic ion transmembrane transport	-6.10859	-3.23715	773,781,1318,2905,3208,3746,3748,3778,5349,5530,5621,8811,9001,9132,9312,23237,30818,54800,84502,131096	CACNA1A,CACNA2D1,SLC31A2,GRIN2C,HPCA,KCNC1,KCNC3,KCNMA1,FXYD3,PPP3CA,PRNP,GALR2,HAP1,KCNQ4,KCNB2,ARC,KCNIP3,KLHL24,JPH4,KCNH8	20/483
11_Member	GO Biological Processes	GO:0034762	regulation of transmembrane transport	-5.53153	-2.76276	773,781,1318,2905,3208,3746,3748,3778,5295,5349,5530,5621,8811,9001,9132,9312,23237,23542,30818,54800,84502,131096	CACNA1A,CACNA2D1,SLC31A2,GRIN2C,HPCA,KCNC1,KCNC3,KCNMA1,PIK3R1,FXYD3,PPP3CA,PRNP,GALR2,HAP1,KCNQ4,KCNB2,ARC,MAPK8IP2,KCNIP3,KLHL24,JPH4,KCNH8	22/622
11_Member	GO Biological Processes	GO:0032412	regulation of monoatomic ion transmembrane transporter activity	-4.04874	-1.6914	781,3208,3746,5349,5530,5621,8811,9001,23237,23542,54800,84502	CACNA2D1,HPCA,KCNC1,FXYD3,PPP3CA,PRNP,GALR2,HAP1,ARC,MAPK8IP2,KLHL24,JPH4	12/279
11_Member	GO Biological Processes	GO:0022898	regulation of transmembrane transporter activity	-3.87707	-1.5967	781,3208,3746,5349,5530,5621,8811,9001,23237,23542,54800,84502	CACNA2D1,HPCA,KCNC1,FXYD3,PPP3CA,PRNP,GALR2,HAP1,ARC,MAPK8IP2,KLHL24,JPH4	12/291
11_Member	GO Biological Processes	GO:1904062	regulation of monoatomic cation transmembrane transport	-3.71548	-1.50046	781,1318,2905,3208,3746,5349,5530,5621,8811,9001,30818,54800,84502	CACNA2D1,SLC31A2,GRIN2C,HPCA,KCNC1,FXYD3,PPP3CA,PRNP,GALR2,HAP1,KCNIP3,KLHL24,JPH4	13/349
11_Member	GO Biological Processes	GO:0010959	regulation of metal ion transport	-3.43357	-1.33787	781,1318,1760,3208,3746,5349,5530,5621,6690,8811,9001,30818,54800,84502	CACNA2D1,SLC31A2,DMPK,HPCA,KCNC1,FXYD3,PPP3CA,PRNP,SPINK1,GALR2,HAP1,KCNIP3,KLHL24,JPH4	14/423
11_Member	GO Biological Processes	GO:0032409	regulation of transporter activity	-3.42622	-1.33534	781,3208,3746,5349,5530,5621,8811,9001,23237,23542,54800,84502	CACNA2D1,HPCA,KCNC1,FXYD3,PPP3CA,PRNP,GALR2,HAP1,ARC,MAPK8IP2,KLHL24,JPH4	12/326
11_Member	GO Biological Processes	GO:2001257	regulation of cation channel activity	-3.39603	-1.32163	781,3208,3746,5530,8811,9001,54800,84502	CACNA2D1,HPCA,KCNC1,PPP3CA,GALR2,HAP1,KLHL24,JPH4	8/155
11_Member	GO Biological Processes	GO:2001259	positive regulation of cation channel activity	-3.03981	-1.10455	781,3746,5530,8811,9001	CACNA2D1,KCNC1,PPP3CA,GALR2,HAP1	5/66
11_Member	GO Biological Processes	GO:0032414	positive regulation of ion transmembrane transporter activity	-2.73641	-0.911595	781,3746,5530,8811,9001,23237	CACNA2D1,KCNC1,PPP3CA,GALR2,HAP1,ARC	6/113
11_Member	GO Biological Processes	GO:0032411	positive regulation of transporter activity	-2.49935	-0.759322	781,3746,5530,8811,9001,23237	CACNA2D1,KCNC1,PPP3CA,GALR2,HAP1,ARC	6/126
11_Member	GO Biological Processes	GO:1901379	regulation of potassium ion transmembrane transport	-2.36274	-0.67315	3746,5621,8811,30818,54800	KCNC1,PRNP,GALR2,KCNIP3,KLHL24	5/94
11_Member	GO Biological Processes	GO:1901019	regulation of calcium ion transmembrane transporter activity	-2.23114	-0.596074	781,3208,5530,9001,84502	CACNA2D1,HPCA,PPP3CA,HAP1,JPH4	5/101
11_Member	GO Biological Processes	GO:0043266	regulation of potassium ion transport	-2.11037	-0.517927	3746,5621,8811,30818,54800	KCNC1,PRNP,GALR2,KCNIP3,KLHL24	5/108
12_Summary	GO Biological Processes	GO:0070848	response to growth factor	-6.19659	-3.25585	1644,1996,2908,3096,3725,3746,3975,4086,4131,5138,5228,6692,6774,7538,9001,9638,10370,10979,23769,55512,126520,1124,1843,2810,5295,26999,2309	DDC,ELAVL4,NR3C1,HIVEP1,JUN,KCNC1,LHX1,SMAD1,MAP1B,PDE2A,PGF,SPINT1,STAT3,ZFP36,HAP1,FEZ1,CITED2,FERMT2,FLRT1,SMPD3,PLK5,CHN2,DUSP1,SFN,PIK3R1,CYFIP2,FOXO3	27/-
12_Member	GO Biological Processes	GO:0070848	response to growth factor	-6.19659	-3.25585	1644,1996,2908,3096,3725,3746,3975,4086,4131,5138,5228,6692,6774,7538,9001,9638,10370,10979,23769,55512,126520	DDC,ELAVL4,NR3C1,HIVEP1,JUN,KCNC1,LHX1,SMAD1,MAP1B,PDE2A,PGF,SPINT1,STAT3,ZFP36,HAP1,FEZ1,CITED2,FERMT2,FLRT1,SMPD3,PLK5	21/521
12_Member	GO Biological Processes	GO:0071363	cellular response to growth factor stimulus	-6.0258	-3.18239	1644,1996,2908,3096,3725,3975,4086,4131,5138,5228,6692,6774,7538,9001,9638,10370,10979,23769,55512,126520	DDC,ELAVL4,NR3C1,HIVEP1,JUN,LHX1,SMAD1,MAP1B,PDE2A,PGF,SPINT1,STAT3,ZFP36,HAP1,FEZ1,CITED2,FERMT2,FLRT1,SMPD3,PLK5	20/489
12_Member	Canonical Pathways	M164	PID ERBB1 DOWNSTREAM PATHWAY	-5.50106	-2.75213	1124,1843,2810,3725,4086,5295,6774,7538,26999	CHN2,DUSP1,SFN,JUN,SMAD1,PIK3R1,STAT3,ZFP36,CYFIP2	9/105
12_Member	GO Biological Processes	GO:1902895	positive regulation of miRNA transcription	-3.52024	-1.38917	2309,2908,3725,4086,6774	FOXO3,NR3C1,JUN,SMAD1,STAT3	5/52
12_Member	GO Biological Processes	GO:2000630	positive regulation of miRNA metabolic process	-3.19658	-1.21163	2309,2908,3725,4086,6774	FOXO3,NR3C1,JUN,SMAD1,STAT3	5/61
12_Member	GO Biological Processes	GO:1902893	regulation of miRNA transcription	-2.95225	-1.05394	2309,2908,3725,4086,6774	FOXO3,NR3C1,JUN,SMAD1,STAT3	5/69
12_Member	GO Biological Processes	GO:2000628	regulation of miRNA metabolic process	-2.61875	-0.842918	2309,2908,3725,4086,6774	FOXO3,NR3C1,JUN,SMAD1,STAT3	5/82
12_Member	GO Biological Processes	GO:0071560	cellular response to transforming growth factor beta stimulus	-2.5943	-0.834569	2908,3725,4086,5138,6774,10370,10979	NR3C1,JUN,SMAD1,PDE2A,STAT3,CITED2,FERMT2	7/162
12_Member	GO Biological Processes	GO:0071559	response to transforming growth factor beta	-2.49221	-0.754681	2908,3725,4086,5138,6774,10370,10979	NR3C1,JUN,SMAD1,PDE2A,STAT3,CITED2,FERMT2	7/169
12_Member	GO Biological Processes	GO:0007179	transforming growth factor beta receptor signaling pathway	-2.23114	-0.596074	3725,4086,6774,10370,10979	JUN,SMAD1,STAT3,CITED2,FERMT2	5/101
12_Member	GO Biological Processes	GO:0007178	transmembrane receptor protein serine/threonine kinase signaling pathway	-2.04349	-0.475973	3096,3725,4086,6774,10370,10979,55512	HIVEP1,JUN,SMAD1,STAT3,CITED2,FERMT2,SMPD3	7/205
13_Summary	GO Biological Processes	GO:0007268	chemical synaptic transmission	-5.88234	-3.07785	773,2030,2550,2905,2908,4204,4884,5530,5799,5864,6812,8447,9001,23025,23208,23542,56853,66004,1363,3670,6478,7088,9679,10979,147111,781,1760,3746,3778,5575,131096,219736	CACNA1A,SLC29A1,GABBR1,GRIN2C,NR3C1,MECP2,NPTX1,PPP3CA,PTPRN2,RAB3A,STXBP1,DOC2B,HAP1,UNC13A,SYT11,MAPK8IP2,CELF4,LYNX1,CPE,ISL1,SIAH2,TLE1,FAM53B,FERMT2,NOTUM,CACNA2D1,DMPK,KCNC1,KCNMA1,PRKAR1B,KCNH8,STOX1	32/-
13_Member	GO Biological Processes	GO:0007268	chemical synaptic transmission	-5.88234	-3.07785	773,2030,2550,2905,2908,4204,4884,5530,5799,5864,6812,8447,9001,23025,23208,23542,56853,66004	CACNA1A,SLC29A1,GABBR1,GRIN2C,NR3C1,MECP2,NPTX1,PPP3CA,PTPRN2,RAB3A,STXBP1,DOC2B,HAP1,UNC13A,SYT11,MAPK8IP2,CELF4,LYNX1	18/412
13_Member	GO Biological Processes	GO:0098916	anterograde trans-synaptic signaling	-5.88234	-3.07785	773,2030,2550,2905,2908,4204,4884,5530,5799,5864,6812,8447,9001,23025,23208,23542,56853,66004	CACNA1A,SLC29A1,GABBR1,GRIN2C,NR3C1,MECP2,NPTX1,PPP3CA,PTPRN2,RAB3A,STXBP1,DOC2B,HAP1,UNC13A,SYT11,MAPK8IP2,CELF4,LYNX1	18/412
13_Member	GO Biological Processes	GO:0099537	trans-synaptic signaling	-5.6491	-2.86874	773,2030,2550,2905,2908,4204,4884,5530,5799,5864,6812,8447,9001,23025,23208,23542,56853,66004	CACNA1A,SLC29A1,GABBR1,GRIN2C,NR3C1,MECP2,NPTX1,PPP3CA,PTPRN2,RAB3A,STXBP1,DOC2B,HAP1,UNC13A,SYT11,MAPK8IP2,CELF4,LYNX1	18/428
13_Member	GO Biological Processes	GO:0099536	synaptic signaling	-5.25477	-2.58686	773,2030,2550,2905,2908,4204,4884,5530,5799,5864,6812,8447,9001,23025,23208,23542,56853,66004	CACNA1A,SLC29A1,GABBR1,GRIN2C,NR3C1,MECP2,NPTX1,PPP3CA,PTPRN2,RAB3A,STXBP1,DOC2B,HAP1,UNC13A,SYT11,MAPK8IP2,CELF4,LYNX1	18/457
13_Member	GO Biological Processes	GO:0060079	excitatory postsynaptic potential	-4.10217	-1.73133	2030,2905,4204,5530,23542,56853	SLC29A1,GRIN2C,MECP2,PPP3CA,MAPK8IP2,CELF4	6/63
13_Member	GO Biological Processes	GO:0099565	chemical synaptic transmission, postsynaptic	-3.88026	-1.5967	2030,2905,4204,5530,23542,56853	SLC29A1,GRIN2C,MECP2,PPP3CA,MAPK8IP2,CELF4	6/69
13_Member	GO Biological Processes	GO:0060078	regulation of postsynaptic membrane potential	-3.78578	-1.54103	2030,2550,2905,4204,5530,23542,56853	SLC29A1,GABBR1,GRIN2C,MECP2,PPP3CA,MAPK8IP2,CELF4	7/102
13_Member	GO Biological Processes	GO:1905114	cell surface receptor signaling pathway involved in cell-cell signaling	-3.65555	-1.46836	1363,2030,2905,3670,4204,5530,6478,7088,9679,10979,23542,56853,147111	CPE,SLC29A1,GRIN2C,ISL1,MECP2,PPP3CA,SIAH2,TLE1,FAM53B,FERMT2,MAPK8IP2,CELF4,NOTUM	13/354
13_Member	GO Biological Processes	GO:0042391	regulation of membrane potential	-3.29366	-1.25897	781,1760,2030,2550,2905,3746,3778,4204,5530,5575,23542,56853,131096,219736	CACNA2D1,DMPK,SLC29A1,GABBR1,GRIN2C,KCNC1,KCNMA1,MECP2,PPP3CA,PRKAR1B,MAPK8IP2,CELF4,KCNH8,STOX1	14/437
14_Summary	GO Biological Processes	GO:0007420	brain development	-5.38166	-2.64588	1600,1996,2905,3208,3670,3746,3975,4086,4204,4760,4761,5087,5122,5530,6585,7832,9001,9638,22911,25861,55558,56949,85446,158067,347733	DAB1,ELAVL4,GRIN2C,HPCA,ISL1,KCNC1,LHX1,SMAD1,MECP2,NEUROD1,NEUROD2,PBX1,PCSK1,PPP3CA,SLIT1,BTG2,HAP1,FEZ1,WDR47,WHRN,PLXNA3,XAB2,ZFHX2,AK8,TUBB2B	25/-
14_Member	GO Biological Processes	GO:0007420	brain development	-5.38166	-2.64588	1600,1996,2905,3208,3670,3746,3975,4086,4204,4760,4761,5087,5122,5530,6585,7832,9001,9638,22911,25861,55558,56949,85446,158067,347733	DAB1,ELAVL4,GRIN2C,HPCA,ISL1,KCNC1,LHX1,SMAD1,MECP2,NEUROD1,NEUROD2,PBX1,PCSK1,PPP3CA,SLIT1,BTG2,HAP1,FEZ1,WDR47,WHRN,PLXNA3,XAB2,ZFHX2,AK8,TUBB2B	25/787
14_Member	GO Biological Processes	GO:0021549	cerebellum development	-4.57666	-2.06695	1600,3746,3975,4204,4760,4761,9001,25861	DAB1,KCNC1,LHX1,MECP2,NEUROD1,NEUROD2,HAP1,WHRN	8/105
14_Member	GO Biological Processes	GO:0022037	metencephalon development	-4.29243	-1.83036	1600,3746,3975,4204,4760,4761,9001,25861	DAB1,KCNC1,LHX1,MECP2,NEUROD1,NEUROD2,HAP1,WHRN	8/115
14_Member	GO Biological Processes	GO:0030900	forebrain development	-4.18454	-1.76175	1600,1996,3670,3746,3975,4760,5122,6585,7832,9001,9638,22911,55558,56949,347733	DAB1,ELAVL4,ISL1,KCNC1,LHX1,NEUROD1,PCSK1,SLIT1,BTG2,HAP1,FEZ1,WDR47,PLXNA3,XAB2,TUBB2B	15/404
14_Member	GO Biological Processes	GO:0030902	hindbrain development	-4.14263	-1.73133	1600,3746,3975,4086,4204,4760,4761,9001,25861	DAB1,KCNC1,LHX1,SMAD1,MECP2,NEUROD1,NEUROD2,HAP1,WHRN	9/155
14_Member	GO Biological Processes	GO:0021537	telencephalon development	-2.89421	-1.01797	1600,3746,3975,4760,7832,9638,22911,55558,56949,347733	DAB1,KCNC1,LHX1,NEUROD1,BTG2,FEZ1,WDR47,PLXNA3,XAB2,TUBB2B	10/276
14_Member	GO Biological Processes	GO:0021543	pallium development	-2.82095	-0.966545	1600,4760,7832,9638,22911,55558,56949,347733	DAB1,NEUROD1,BTG2,FEZ1,WDR47,PLXNA3,XAB2,TUBB2B	8/190
14_Member	GO Biological Processes	GO:0021761	limbic system development	-2.60479	-0.837753	1600,4760,7832,9001,9638,55558	DAB1,NEUROD1,BTG2,HAP1,FEZ1,PLXNA3	6/120
14_Member	GO Biological Processes	GO:0021766	hippocampus development	-2.42287	-0.71816	1600,4760,7832,9638,55558	DAB1,NEUROD1,BTG2,FEZ1,PLXNA3	5/91
15_Summary	Reactome Gene Sets	R-HSA-112316	Neuronal System	-5.28588	-2.58686	773,781,2550,2905,3746,3748,3778,4905,5575,5864,6812,9132,9312,10381,79414,131096,347733,9001,23710	CACNA1A,CACNA2D1,GABBR1,GRIN2C,KCNC1,KCNC3,KCNMA1,NSF,PRKAR1B,RAB3A,STXBP1,KCNQ4,KCNB2,TUBB3,LRFN3,KCNH8,TUBB2B,HAP1,GABARAPL1	19/-
15_Member	Reactome Gene Sets	R-HSA-112316	Neuronal System	-5.28588	-2.58686	773,781,2550,2905,3746,3748,3778,4905,5575,5864,6812,9132,9312,10381,79414,131096,347733	CACNA1A,CACNA2D1,GABBR1,GRIN2C,KCNC1,KCNC3,KCNMA1,NSF,PRKAR1B,RAB3A,STXBP1,KCNQ4,KCNB2,TUBB3,LRFN3,KCNH8,TUBB2B	17/410
15_Member	Reactome Gene Sets	R-HSA-112315	Transmission across Chemical Synapses	-2.96564	-1.06269	773,781,2550,2905,4905,5575,5864,6812,10381,347733	CACNA1A,CACNA2D1,GABBR1,GRIN2C,NSF,PRKAR1B,RAB3A,STXBP1,TUBB3,TUBB2B	10/270
15_Member	KEGG Pathway	hsa04727	GABAergic synapse	-2.46432	-0.745169	773,2550,4905,9001,23710	CACNA1A,GABBR1,NSF,HAP1,GABARAPL1	5/89
16_Summary	GO Biological Processes	GO:0043086	negative regulation of catalytic activity	-5.27014	-2.58686	710,1843,2550,2810,3208,5274,5276,5575,5585,5621,6478,6690,6692,7345,7538,8811,9806,9961,10459,23645,64114,94032,3725,8878	SERPING1,DUSP1,GABBR1,SFN,HPCA,SERPINI1,SERPINI2,PRKAR1B,PKN1,PRNP,SIAH2,SPINK1,SPINT1,UCHL1,ZFP36,GALR2,SPOCK2,MVP,MAD2L2,PPP1R15A,TMBIM1,CAMK2N2,JUN,SQSTM1	24/-
16_Member	GO Biological Processes	GO:0043086	negative regulation of catalytic activity	-5.27014	-2.58686	710,1843,2550,2810,3208,5274,5276,5575,5585,5621,6478,6690,6692,7345,7538,8811,9806,9961,10459,23645,64114,94032	SERPING1,DUSP1,GABBR1,SFN,HPCA,SERPINI1,SERPINI2,PRKAR1B,PKN1,PRNP,SIAH2,SPINK1,SPINT1,UCHL1,ZFP36,GALR2,SPOCK2,MVP,MAD2L2,PPP1R15A,TMBIM1,CAMK2N2	22/646
16_Member	GO Biological Processes	GO:0045936	negative regulation of phosphate metabolic process	-2.47538	-0.747997	1843,2810,3208,3725,5575,5585,5621,6690,7345,9961,23645,94032	DUSP1,SFN,HPCA,JUN,PRKAR1B,PKN1,PRNP,SPINK1,UCHL1,MVP,PPP1R15A,CAMK2N2	12/422
16_Member	GO Biological Processes	GO:0010563	negative regulation of phosphorus metabolic process	-2.46718	-0.745169	1843,2810,3208,3725,5575,5585,5621,6690,7345,9961,23645,94032	DUSP1,SFN,HPCA,JUN,PRKAR1B,PKN1,PRNP,SPINK1,UCHL1,MVP,PPP1R15A,CAMK2N2	12/423
16_Member	GO Biological Processes	GO:0051348	negative regulation of transferase activity	-2.44911	-0.734024	1843,2810,5575,5585,7345,7538,9961,10459,94032	DUSP1,SFN,PRKAR1B,PKN1,UCHL1,ZFP36,MVP,MAD2L2,CAMK2N2	9/267
16_Member	GO Biological Processes	GO:0031400	negative regulation of protein modification process	-2.4351	-0.72203	1843,2810,3725,5575,5585,5621,6690,7345,8878,9961,10459,23645,94032	DUSP1,SFN,JUN,PRKAR1B,PKN1,PRNP,SPINK1,UCHL1,SQSTM1,MVP,MAD2L2,PPP1R15A,CAMK2N2	13/483
16_Member	GO Biological Processes	GO:0001933	negative regulation of protein phosphorylation	-2.30027	-0.635655	1843,2810,3725,5575,5585,5621,6690,7345,9961,94032	DUSP1,SFN,JUN,PRKAR1B,PKN1,PRNP,SPINK1,UCHL1,MVP,CAMK2N2	10/334
16_Member	GO Biological Processes	GO:0042326	negative regulation of phosphorylation	-2.04893	-0.479247	1843,2810,3725,5575,5585,5621,6690,7345,9961,94032	DUSP1,SFN,JUN,PRKAR1B,PKN1,PRNP,SPINK1,UCHL1,MVP,CAMK2N2	10/364
16_Member	GO Biological Processes	GO:0006469	negative regulation of protein kinase activity	-2.00026	-0.440582	1843,2810,5575,5585,7345,9961,94032	DUSP1,SFN,PRKAR1B,PKN1,UCHL1,MVP,CAMK2N2	7/209
17_Summary	GO Biological Processes	GO:0050808	synapse organization	-5.26678	-2.58686	323,4131,4204,4884,5063,5621,5864,9026,9806,23025,23237,26470,79414,84966,92737,89,5010,10979,25861	APBB2,MAP1B,MECP2,NPTX1,PAK3,PRNP,RAB3A,HIP1R,SPOCK2,UNC13A,ARC,SEZ6L2,LRFN3,IGSF21,DNER,ACTN3,CLDN11,FERMT2,WHRN	19/-
17_Member	GO Biological Processes	GO:0050808	synapse organization	-5.26678	-2.58686	323,4131,4204,4884,5063,5621,5864,9026,9806,23025,23237,26470,79414,84966,92737	APBB2,MAP1B,MECP2,NPTX1,PAK3,PRNP,RAB3A,HIP1R,SPOCK2,UNC13A,ARC,SEZ6L2,LRFN3,IGSF21,DNER	15/326
17_Member	GO Biological Processes	GO:0034330	cell junction organization	-5.02716	-2.40288	89,323,4131,4204,4884,5010,5063,5621,5864,9026,9806,10979,23025,23237,25861,26470,79414,84966,92737	ACTN3,APBB2,MAP1B,MECP2,NPTX1,CLDN11,PAK3,PRNP,RAB3A,HIP1R,SPOCK2,FERMT2,UNC13A,ARC,WHRN,SEZ6L2,LRFN3,IGSF21,DNER	19/522
17_Member	GO Biological Processes	GO:0007416	synapse assembly	-2.06157	-0.486801	4131,4204,4884,9806,92737	MAP1B,MECP2,NPTX1,SPOCK2,DNER	5/111
18_Summary	GO Biological Processes	GO:0010038	response to metal ion	-5.25162	-2.58686	2696,3208,3725,3726,3746,3778,3815,4761,4884,5122,5530,5621,5860,9350,23208,55512,4131,84918,140606,1996,10518	GIPR,HPCA,JUN,JUNB,KCNC1,KCNMA1,KIT,NEUROD2,NPTX1,PCSK1,PPP3CA,PRNP,QDPR,CER1,SYT11,SMPD3,MAP1B,LRP11,SELENOM,ELAVL4,CIB2	21/-
18_Member	GO Biological Processes	GO:0010038	response to metal ion	-5.25162	-2.58686	2696,3208,3725,3726,3746,3778,3815,4761,4884,5122,5530,5621,5860,9350,23208,55512	GIPR,HPCA,JUN,JUNB,KCNC1,KCNMA1,KIT,NEUROD2,NPTX1,PCSK1,PPP3CA,PRNP,QDPR,CER1,SYT11,SMPD3	16/369
18_Member	GO Biological Processes	GO:0010035	response to inorganic substance	-4.83336	-2.27013	2696,3208,3725,3726,3746,3778,3815,4131,4761,4884,5122,5530,5621,5860,9350,23208,55512,84918,140606	GIPR,HPCA,JUN,JUNB,KCNC1,KCNMA1,KIT,MAP1B,NEUROD2,NPTX1,PCSK1,PPP3CA,PRNP,QDPR,CER1,SYT11,SMPD3,LRP11,SELENOM	19/539
18_Member	GO Biological Processes	GO:0051592	response to calcium ion	-4.27551	-1.82458	2696,3208,3725,3726,3778,4761,5122,5530,23208	GIPR,HPCA,JUN,JUNB,KCNMA1,NEUROD2,PCSK1,PPP3CA,SYT11	9/149
18_Member	GO Biological Processes	GO:1902074	response to salt	-3.89632	-1.5967	1996,2696,3208,3725,3726,3746,3778,4761,4884,5122,5530,10518,23208,84918	ELAVL4,GIPR,HPCA,JUN,JUNB,KCNC1,KCNMA1,NEUROD2,NPTX1,PCSK1,PPP3CA,CIB2,SYT11,LRP11	14/381
18_Member	GO Biological Processes	GO:0071248	cellular response to metal ion	-3.28354	-1.25096	3208,3725,3726,4761,4884,5621,9350,23208,55512	HPCA,JUN,JUNB,NEUROD2,NPTX1,PRNP,CER1,SYT11,SMPD3	9/202
18_Member	GO Biological Processes	GO:0071241	cellular response to inorganic substance	-2.83371	-0.976328	3208,3725,3726,4761,4884,5621,9350,23208,55512	HPCA,JUN,JUNB,NEUROD2,NPTX1,PRNP,CER1,SYT11,SMPD3	9/234
18_Member	GO Biological Processes	GO:0071277	cellular response to calcium ion	-2.48546	-0.753907	3208,3725,3726,4761,23208	HPCA,JUN,JUNB,NEUROD2,SYT11	5/88
18_Member	GO Biological Processes	GO:1902075	cellular response to salt	-2.0879	-0.499013	3208,3725,3726,4761,4884,10518,23208	HPCA,JUN,JUNB,NEUROD2,NPTX1,CIB2,SYT11	7/201
19_Summary	GO Biological Processes	GO:0033366	protein localization to secretory granule	-5.24522	-2.58686	1113,1363,29106	CHGA,CPE,SCG3	3/-
19_Member	GO Biological Processes	GO:0033366	protein localization to secretory granule	-5.24522	-2.58686	1113,1363,29106	CHGA,CPE,SCG3	3/4
20_Summary	GO Biological Processes	GO:0051640	organelle localization	-5.00391	-2.38974	547,1113,1600,1759,3800,3815,4000,4131,5864,6585,6812,7345,8120,9001,9638,23025,23208,23233,54785,147700	KIF1A,CHGA,DAB1,DNM1,KIF5C,KIT,LMNA,MAP1B,RAB3A,SLIT1,STXBP1,UCHL1,AP3B2,HAP1,FEZ1,UNC13A,SYT11,EXOC6B,BORCS6,KLC3	20/-
20_Member	GO Biological Processes	GO:0051640	organelle localization	-5.00391	-2.38974	547,1113,1600,1759,3800,3815,4000,4131,5864,6585,6812,7345,8120,9001,9638,23025,23208,23233,54785	KIF1A,CHGA,DAB1,DNM1,KIF5C,KIT,LMNA,MAP1B,RAB3A,SLIT1,STXBP1,UCHL1,AP3B2,HAP1,FEZ1,UNC13A,SYT11,EXOC6B,BORCS6	19/524
20_Member	GO Biological Processes	GO:0051656	establishment of organelle localization	-4.93804	-2.34536	547,1113,1759,3800,3815,4000,4131,5864,6585,7345,8120,9001,9638,23208,23233,54785	KIF1A,CHGA,DNM1,KIF5C,KIT,LMNA,MAP1B,RAB3A,SLIT1,UCHL1,AP3B2,HAP1,FEZ1,SYT11,EXOC6B,BORCS6	16/391
20_Member	GO Biological Processes	GO:0008088	axo-dendritic transport	-3.71176	-1.49993	547,3800,7345,8120,9001,147700	KIF1A,KIF5C,UCHL1,AP3B2,HAP1,KLC3	6/74
20_Member	GO Biological Processes	GO:0072384	organelle transport along microtubule	-3.43957	-1.34143	547,4131,7345,8120,9001,54785	KIF1A,MAP1B,UCHL1,AP3B2,HAP1,BORCS6	6/83
20_Member	GO Biological Processes	GO:0051654	establishment of mitochondrion localization	-3.40102	-1.3243	4131,7345,9001,9638	MAP1B,UCHL1,HAP1,FEZ1	4/31
20_Member	GO Biological Processes	GO:0048489	synaptic vesicle transport	-3.29463	-1.25897	1759,3800,5864,8120	DNM1,KIF5C,RAB3A,AP3B2	4/33
20_Member	GO Biological Processes	GO:0010970	transport along microtubule	-3.21603	-1.21965	547,3800,4131,7345,8120,9001,54785,147700	KIF1A,KIF5C,MAP1B,UCHL1,AP3B2,HAP1,BORCS6,KLC3	8/165
20_Member	GO Biological Processes	GO:0098930	axonal transport	-3.19658	-1.21163	547,3800,7345,8120,9001	KIF1A,KIF5C,UCHL1,AP3B2,HAP1	5/61
20_Member	GO Biological Processes	GO:0051650	establishment of vesicle localization	-3.13112	-1.1805	547,1759,3800,5864,8120,9001,23208,23233	KIF1A,DNM1,KIF5C,RAB3A,AP3B2,HAP1,SYT11,EXOC6B	8/170
20_Member	GO Biological Processes	GO:0051648	vesicle localization	-2.92451	-1.03231	547,1759,3800,5864,8120,9001,23208,23233	KIF1A,DNM1,KIF5C,RAB3A,AP3B2,HAP1,SYT11,EXOC6B	8/183
20_Member	GO Biological Processes	GO:0097479	synaptic vesicle localization	-2.89231	-1.01797	1759,3800,5864,8120	DNM1,KIF5C,RAB3A,AP3B2	4/42
20_Member	GO Biological Processes	GO:0008089	anterograde axonal transport	-2.74396	-0.912594	547,3800,8120,9001	KIF1A,KIF5C,AP3B2,HAP1	4/46
20_Member	GO Biological Processes	GO:0030705	cytoskeleton-dependent intracellular transport	-2.615	-0.842918	547,3800,4131,7345,8120,9001,54785,147700	KIF1A,KIF5C,MAP1B,UCHL1,AP3B2,HAP1,BORCS6,KLC3	8/205
20_Member	GO Biological Processes	GO:0099111	microtubule-based transport	-2.60198	-0.837753	547,3800,4131,7345,8120,9001,54785,147700	KIF1A,KIF5C,MAP1B,UCHL1,AP3B2,HAP1,BORCS6,KLC3	8/206
20_Member	GO Biological Processes	GO:0051646	mitochondrion localization	-2.57806	-0.819451	4131,7345,9001,9638	MAP1B,UCHL1,HAP1,FEZ1	4/51
20_Member	GO Biological Processes	GO:0034643	establishment of mitochondrion localization, microtubule-mediated	-2.51247	-0.770291	4131,7345,9001	MAP1B,UCHL1,HAP1	3/26
20_Member	GO Biological Processes	GO:0047497	mitochondrion transport along microtubule	-2.51247	-0.770291	4131,7345,9001	MAP1B,UCHL1,HAP1	3/26

## Sheet: up_overlap
names	log_pvals_adj	pvals_adj	sheet_name
Neurod2	56.792	1.61421e-57	Upregulated
Cck	29.9352	1.16093e-30	Upregulated
Neurod1	22.2952	5.06702e-23	Upregulated				The list of common genes between the list of upregulated genes in Ndrfhigh cells and the list of Ndrf target genes from Bayam et al., 2015
Runx1t1	19.7272	1.87395e-20	Upregulated
Olfm1	19.3354	4.6192e-20	Upregulated
Btg2	15.9643	1.08579e-16	Upregulated
Map1b	15.09	8.12899e-16	Upregulated
Dner	13.1208	7.57126e-14	Upregulated
Shf	11.3432	4.53732e-12	Upregulated
Cacna2d1	10.6753	2.11216e-11	Upregulated
Enho	10.4284	3.7293e-11	Upregulated
Cd40	9.64388	2.27047e-10	Upregulated
Celf4	9.61808	2.40945e-10	Upregulated
Lhx1	8.78052	1.65761e-09	Upregulated
Grin2c	8.37747	4.19304e-09	Upregulated
Nhlh1	8.24097	5.7416e-09	Upregulated
Nek6	8.17332	6.70932e-09	Upregulated
Cer1	8.1339	7.34681e-09	Upregulated
Rbfox3	7.54102	2.87724e-08	Upregulated
Tspan5	6.58024	2.62884e-07	Upregulated
Fhl2	6.39512	4.02602e-07	Upregulated
Nfic	6.02348	9.47364e-07	Upregulated
Fam53b	5.70436	1.97534e-06	Upregulated
Ncs1	5.17869	6.62692e-06	Upregulated
Dusp8	5.17495	6.68418e-06	Upregulated
Fam49b	5.07632	8.38849e-06	Upregulated
Nfatc2	5.00054	9.98769e-06	Upregulated
Sulf2	4.98806	1.02788e-05	Upregulated
Slc29a1	4.23756	5.78684e-05	Upregulated
Igsf21	4.19175	6.4305e-05	Upregulated
Slc29a4	3.87633	0.000132943	Upregulated
Dab1	3.81081	0.000154594	Upregulated
Mmd2	3.78227	0.000165094	Upregulated
Cog1	3.68918	0.000204559	Upregulated
Nefm	3.67609	0.000210818	Upregulated
Chn2	3.63783	0.000230235	Upregulated
Kit	3.42323	0.000377376	Upregulated
Banp	3.40908	0.000389866	Upregulated
Tle1	3.40697	0.000391772	Upregulated
Tmem150c	3.29519	0.000506763	Upregulated
Smad1	2.89715	0.00126722	Upregulated
Vps37b	2.86892	0.00135231	Upregulated
Slit1	2.85241	0.00140471	Upregulated
Flrt1	2.84225	0.00143796	Upregulated
Snd1	2.7272	0.00187412	Upregulated
Celf2	2.5779	0.00264304	Upregulated
Rwdd3	2.509	0.00309745	Upregulated
Dpysl5	1.92952	0.0117621	Upregulated
Sdc3	1.61373	0.0243371	Upregulated

## Sheet: Down_overlap
names	log_pvals_adj	pvals_adj	sheet_name
Dll1	17.5407	2.87961e-18	Downregulated
Phlda1	17.1738	6.70245e-18	Downregulated
Sox11	12.787	1.63294e-13	Downregulated
Gadd45g	12.1532	7.02719e-13	Downregulated
Fam101a	9.25519	5.55662e-10	Downregulated
Aldh1b1	8.95561	1.10762e-09	Downregulated
Dap	7.46409	3.43483e-08	Downregulated
Hs6st1	7.12247	7.54268e-08	Downregulated
Csrp2	6.73139	1.85614e-07	Downregulated				The list of common genes between the list of downregulated genes in Ndrfhigh cells and the list of Ndrf target genes from Bayam et al., 2015
Hdac11	6.21777	6.05656e-07	Downregulated
Hes1	6.21432	6.10488e-07	Downregulated
Atoh8	6.0876	8.17337e-07	Downregulated
Pitpnm2	5.76061	1.73536e-06	Downregulated
Zfp36l1	5.28067	5.23999e-06	Downregulated
Pard3	5.26009	5.49432e-06	Downregulated
Lrrn2	4.949	1.12459e-05	Downregulated
Prr5	4.65385	2.21897e-05	Downregulated
Spsb4	4.45041	3.54482e-05	Downregulated
Ptn	4.1471	7.12692e-05	Downregulated
Dact1	3.80691	0.000155988	Downregulated
Hebp2	3.75603	0.000175377	Downregulated
Slc25a13	3.49582	0.000319284	Downregulated
Gtf3c1	3.32913	0.00046867	Downregulated
E2f1	3.03077	0.000931593	Downregulated
Cep164	2.99134	0.00102013	Downregulated
Pxdn	2.95504	0.00110906	Downregulated
Rnd3	2.85218	0.00140548	Downregulated
Fgf12	2.72739	0.0018733	Downregulated
Nrp1	2.72196	0.00189689	Downregulated
Enc1	2.70061	0.00199247	Downregulated
Gsg1l	2.69472	0.00201966	Downregulated
Nfix	2.69472	0.00201966	Downregulated
Tcf20	2.62148	0.00239066	Downregulated
Fat4	2.54121	0.002876	Downregulated
Zmynd8	2.4786	0.003322	Downregulated
Adcy5	2.46632	0.00341725	Downregulated
Ezr	2.4624	0.00344824	Downregulated
Ralgapa2	2.42105	0.00379268	Downregulated
Fgfr1	2.39399	0.00403654	Downregulated
Vat1	2.21663	0.00607255	Downregulated
Nkd1	2.16754	0.00679924	Downregulated
Spg20	2.08231	0.0082736	Downregulated
Frmd4b	1.98506	0.0103499	Downregulated
Gas2	1.92961	0.0117595	Downregulated
Dab2ip	1.89989	0.0125924	Downregulated
Tnrc6c	1.80362	0.0157174	Downregulated
Tenm4	1.65076	0.0223481	Downregulated
Wnt9a	1.64673	0.0225563	Downregulated
Sipa1l3	1.64223	0.0227913	Downregulated
Traf3	1.49812	0.0317602	Downregulated
Map2k3	1.47806	0.0332616	Downregulated
Pam	1.47631	0.0333956	Downregulated
Ppif	1.37806	0.0418735	Downregulated
Smarca2	1.33122	0.0466419	Downregulated
Gins2	1.30647	0.0493775	Downregulated
